# Supplementary material for: Discovery of lipid-mediated protein–protein interactions in living cells using metabolic labeling with photoactivatable clickable probes
Source: Royal Society of Chemistry journal article supplement (doi:10.1039/d2sc06116c), 2023-01-01

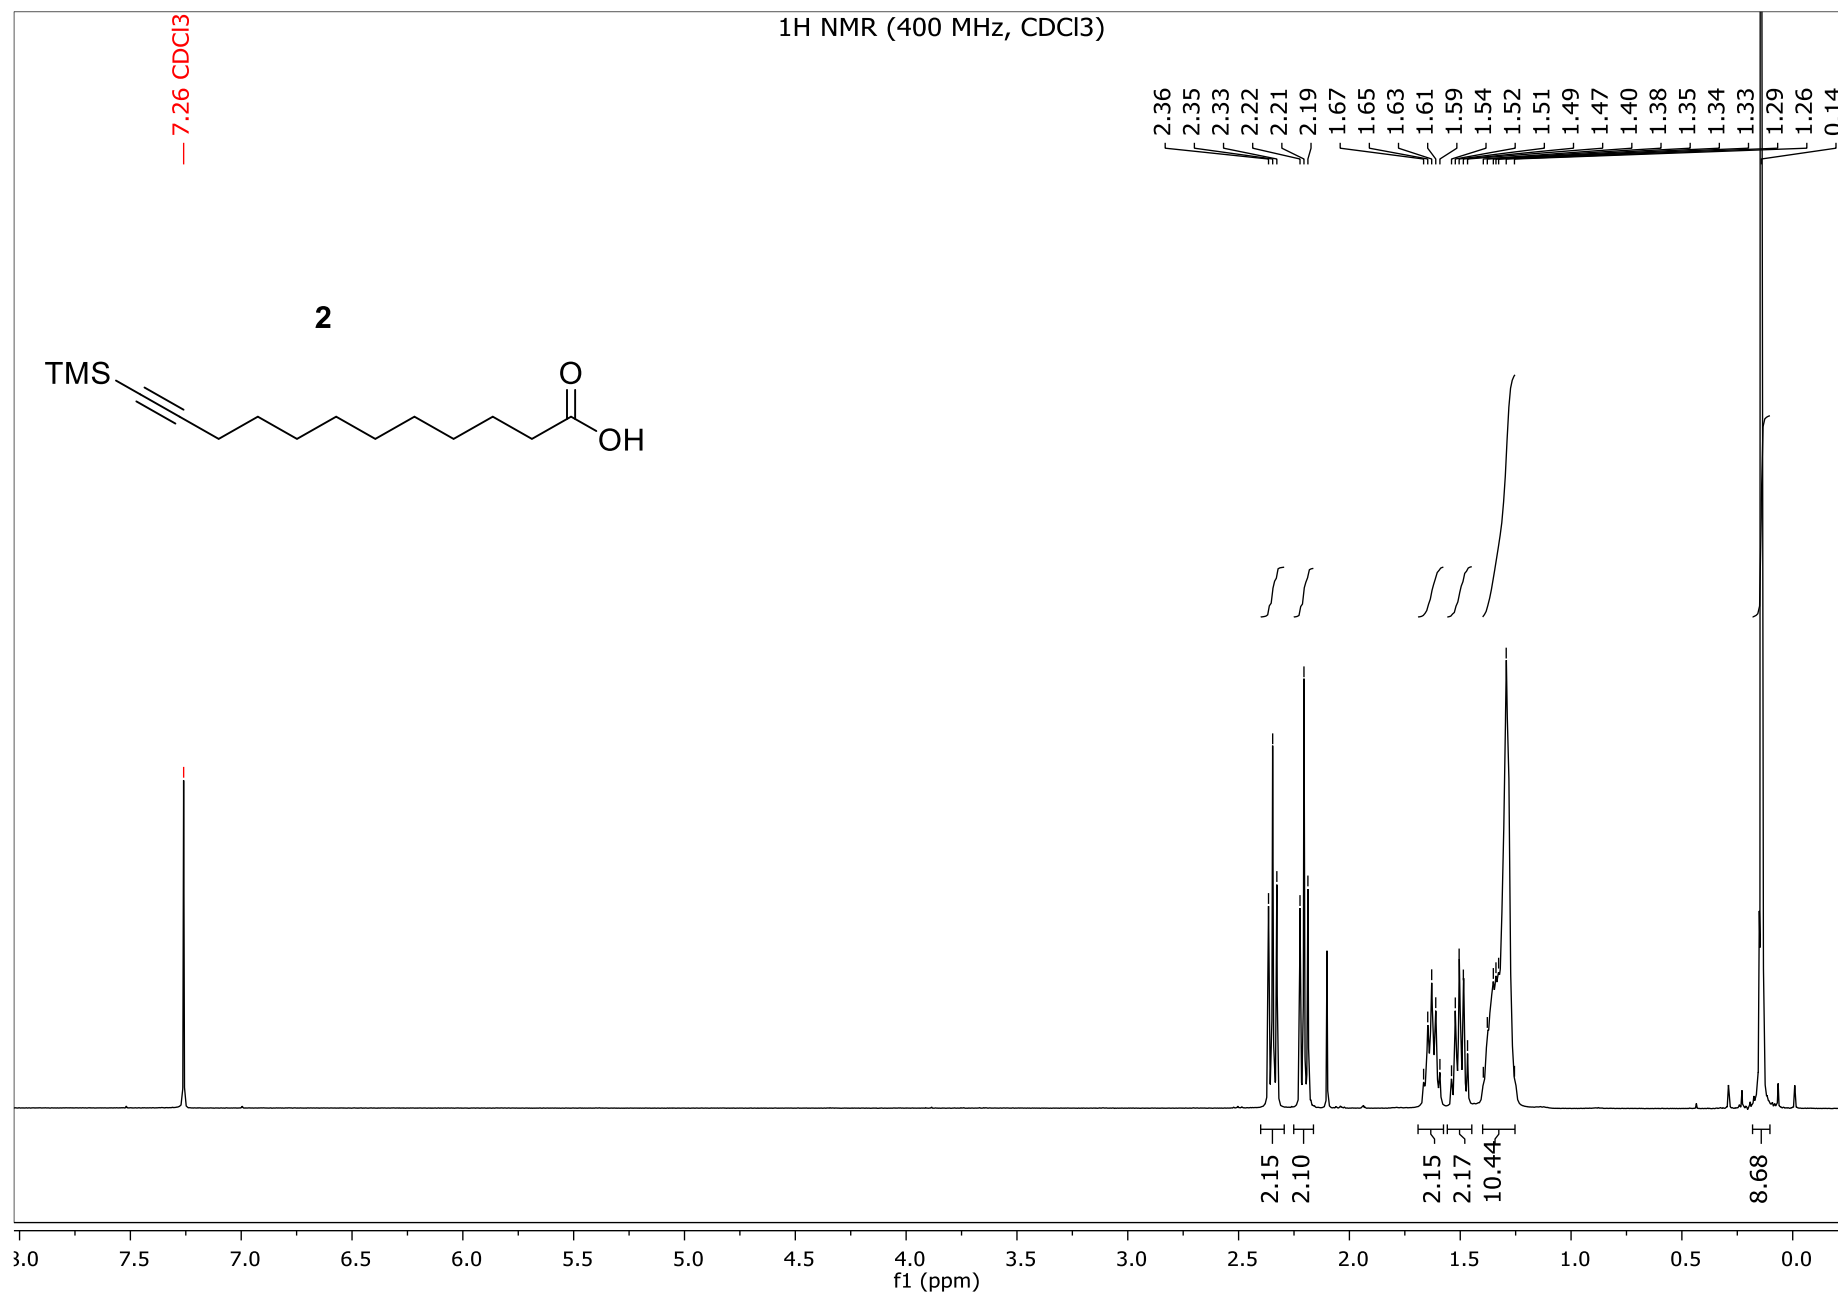

<sup>13</sup>C NMR (101 MHz, CDCl<sub>3</sub>)

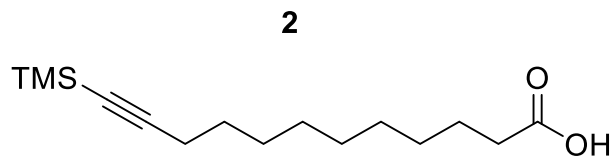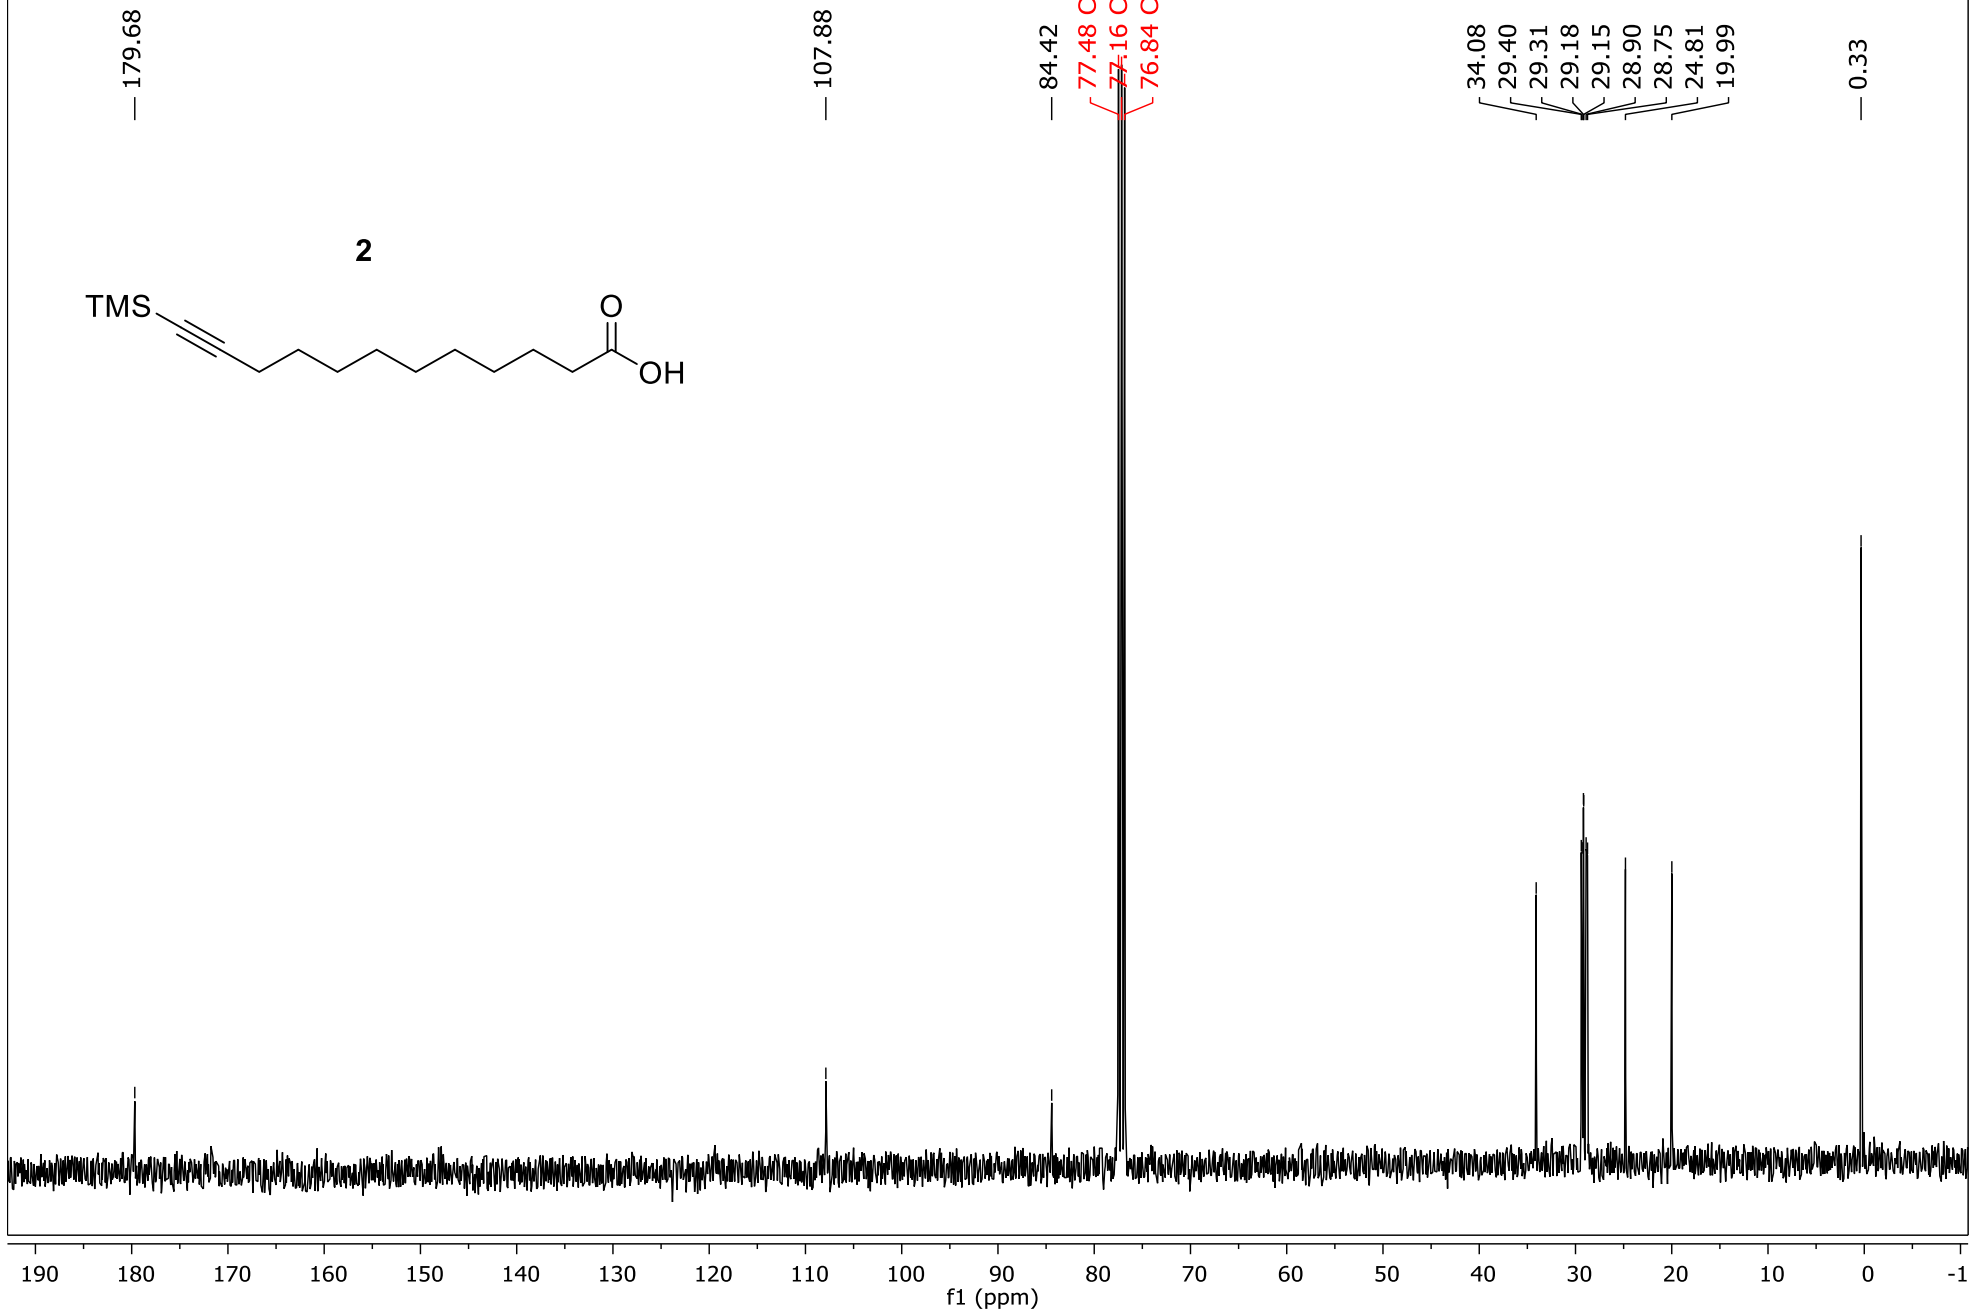

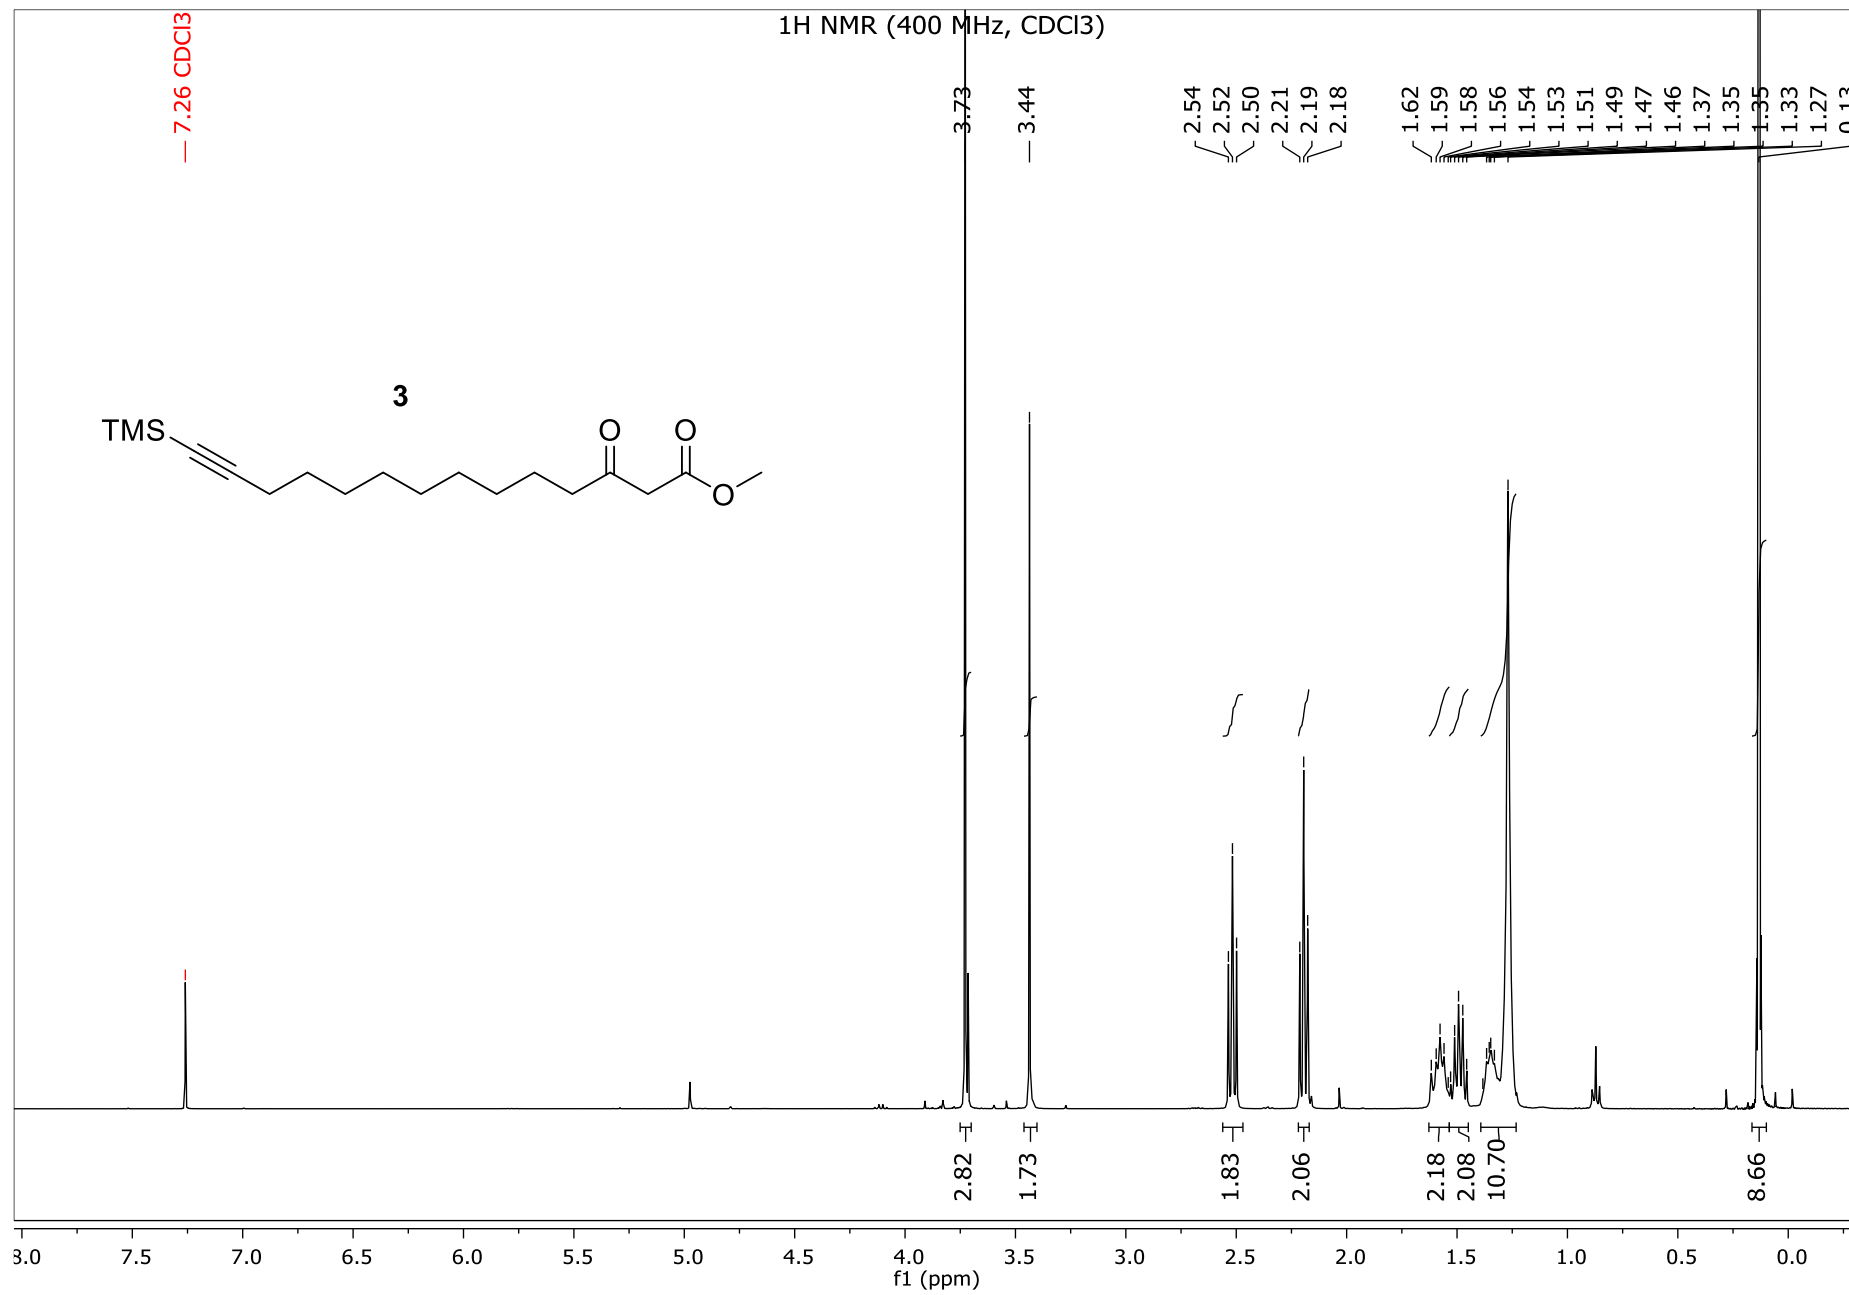

<sup>13</sup>C NMR (101 MHz, CDCl<sub>3</sub>)

— 202.94

— 167.83

— 107.85

84.39

77.48 CDCl<sub>3</sub>

77.16 CDCl<sub>3</sub>

76.84 CDCl<sub>3</sub>

52.45

49.15

43.20

29.40

29.38

29.13

29.10

28.88

28.73

23.57

19.97

— 0.31

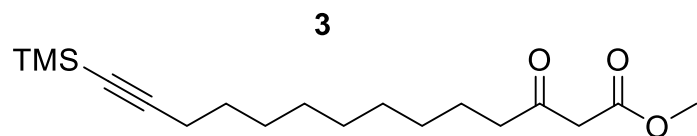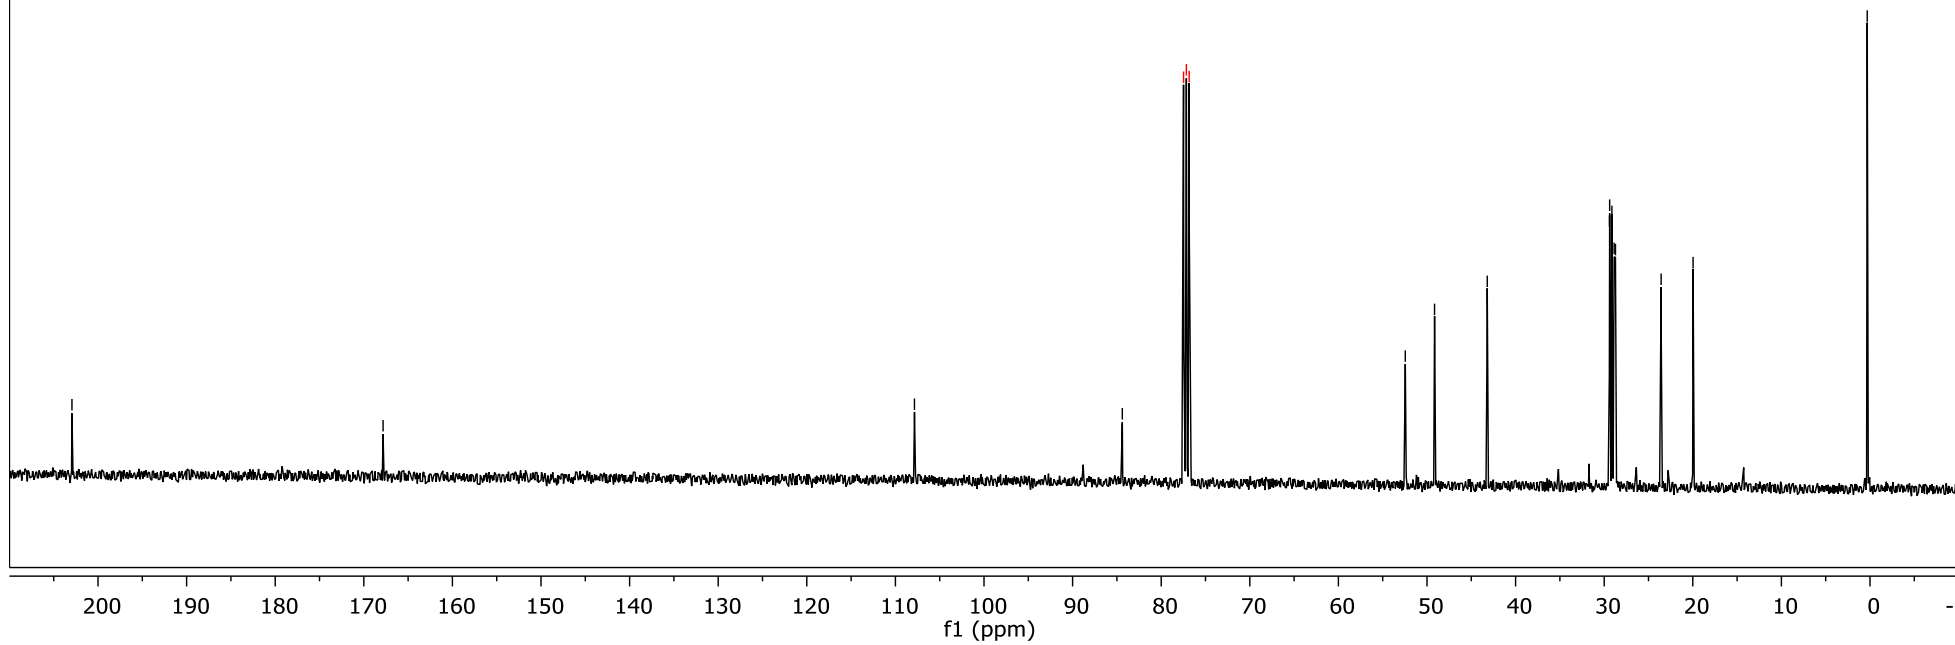

1H NMR (400 MHz, CDCl3)

7.26 CDCl3

4

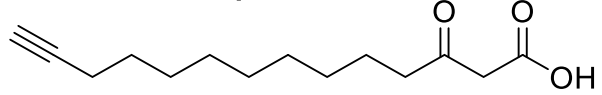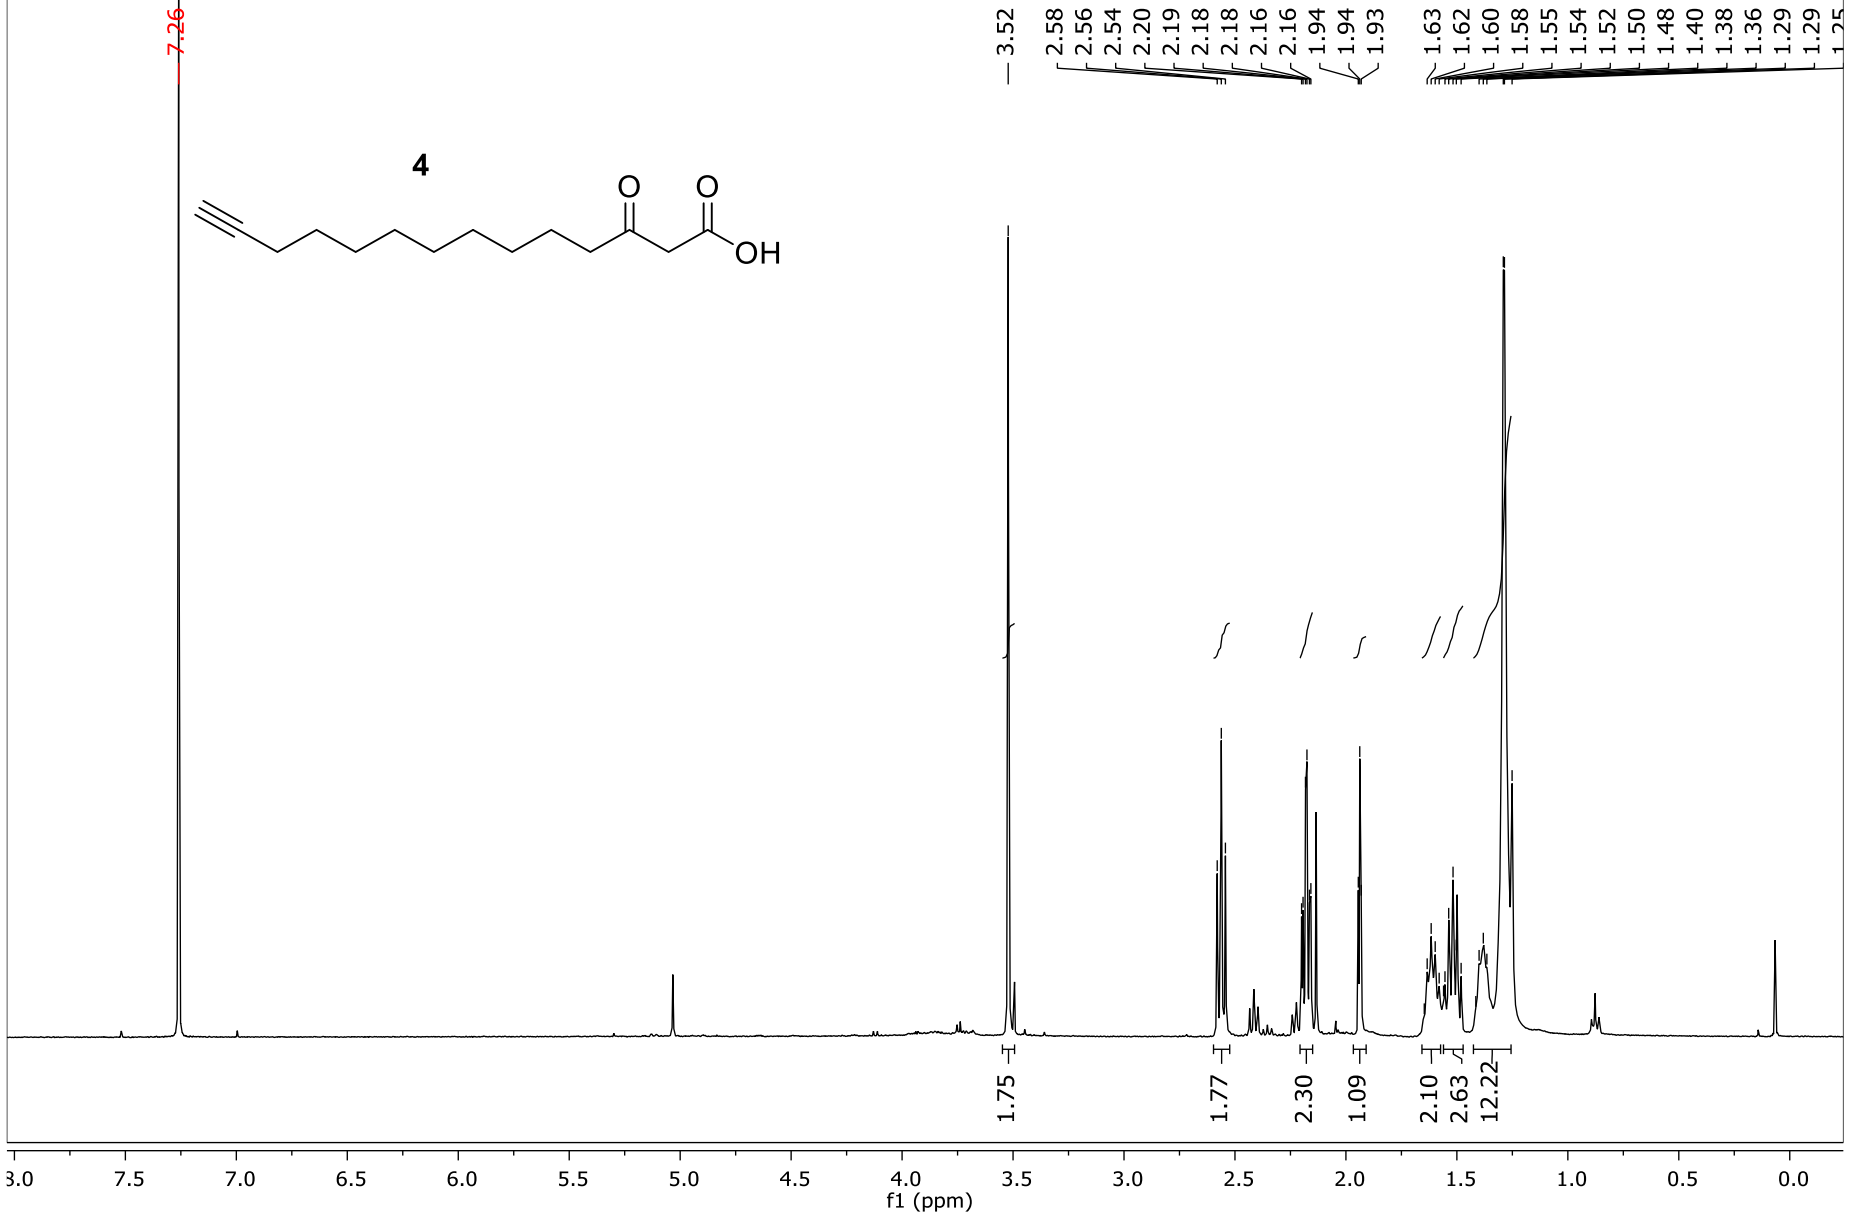

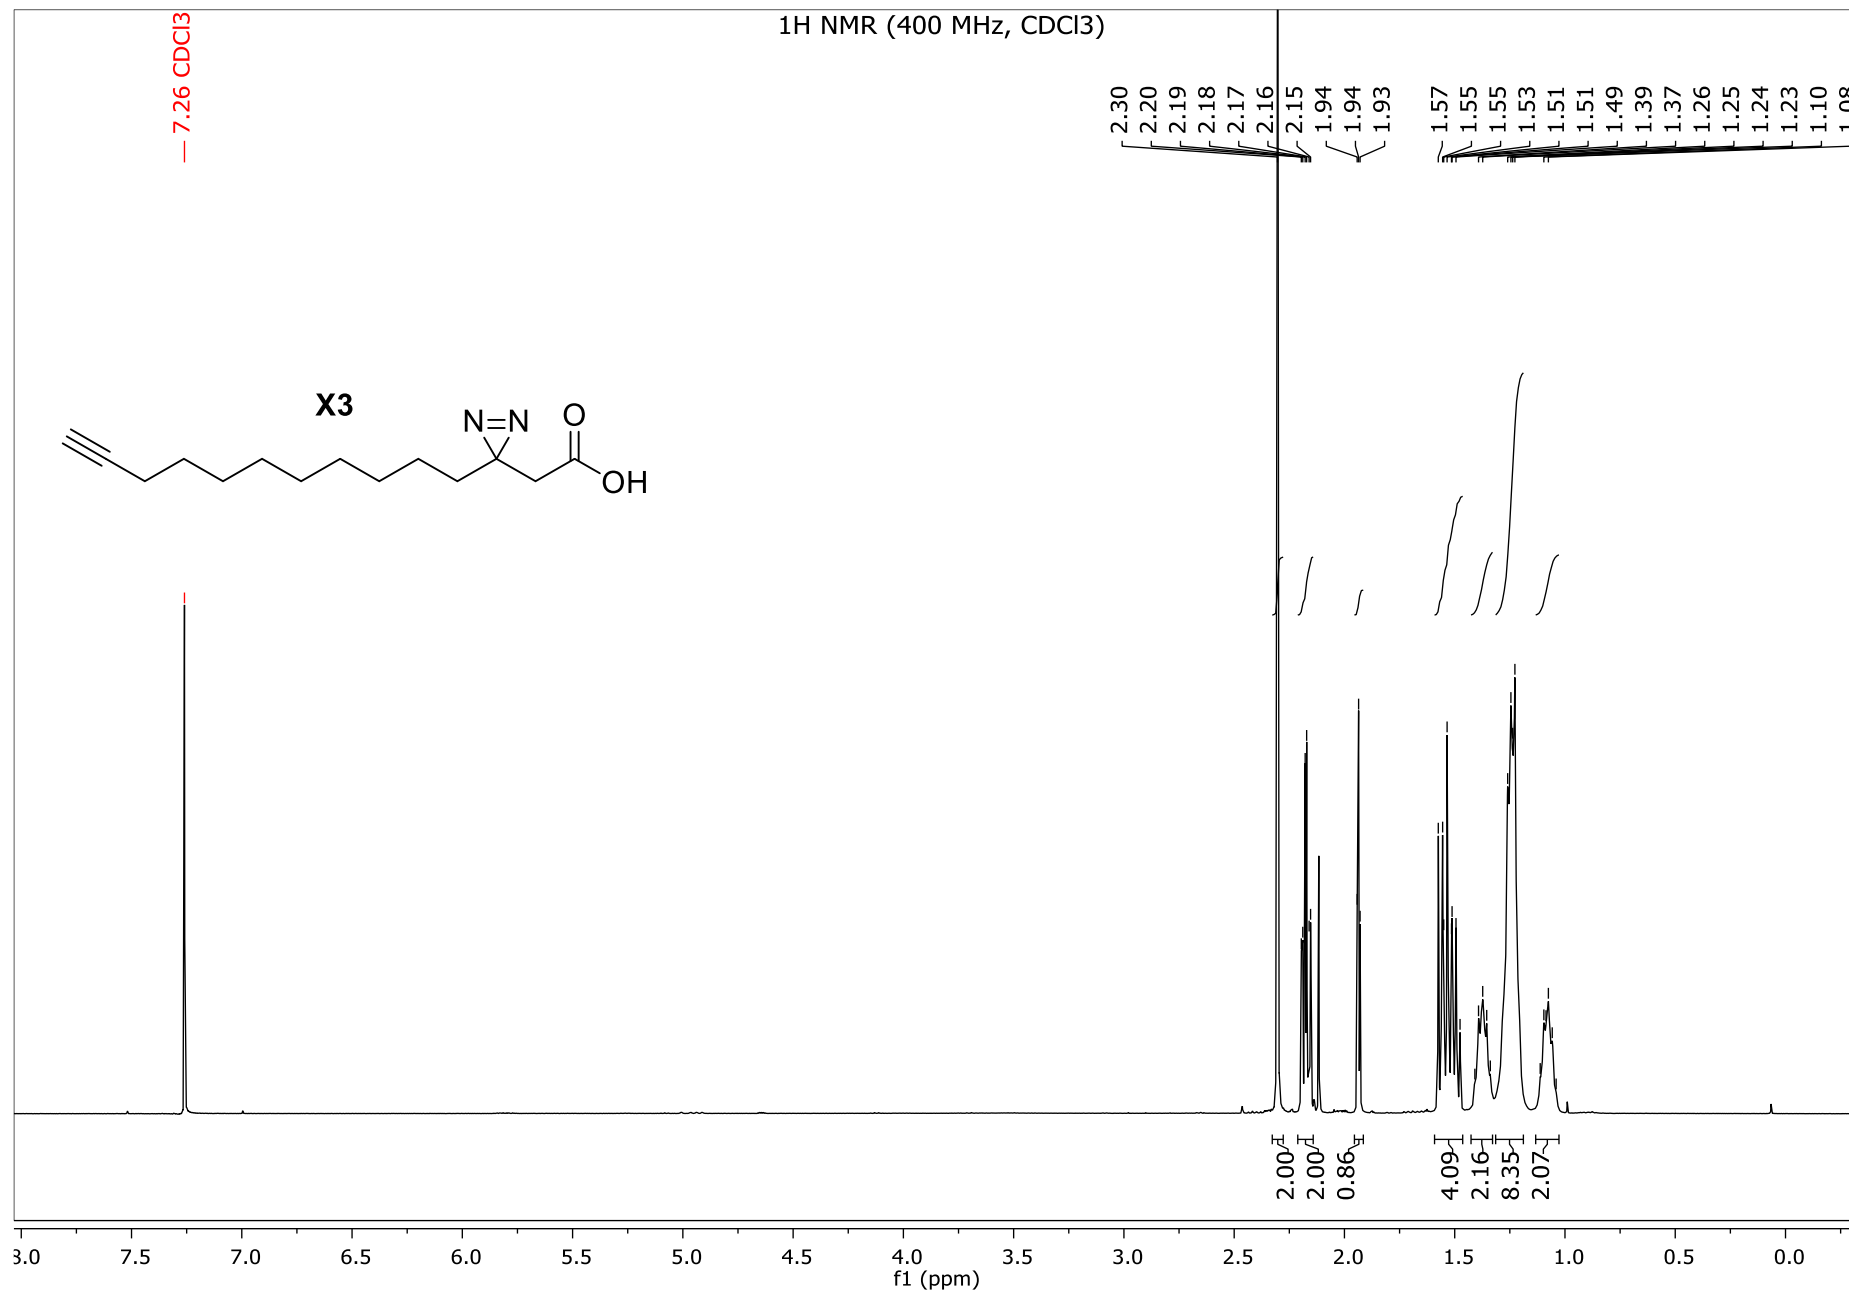

<sup>13</sup>C NMR (101 MHz, CDCl<sub>3</sub>)

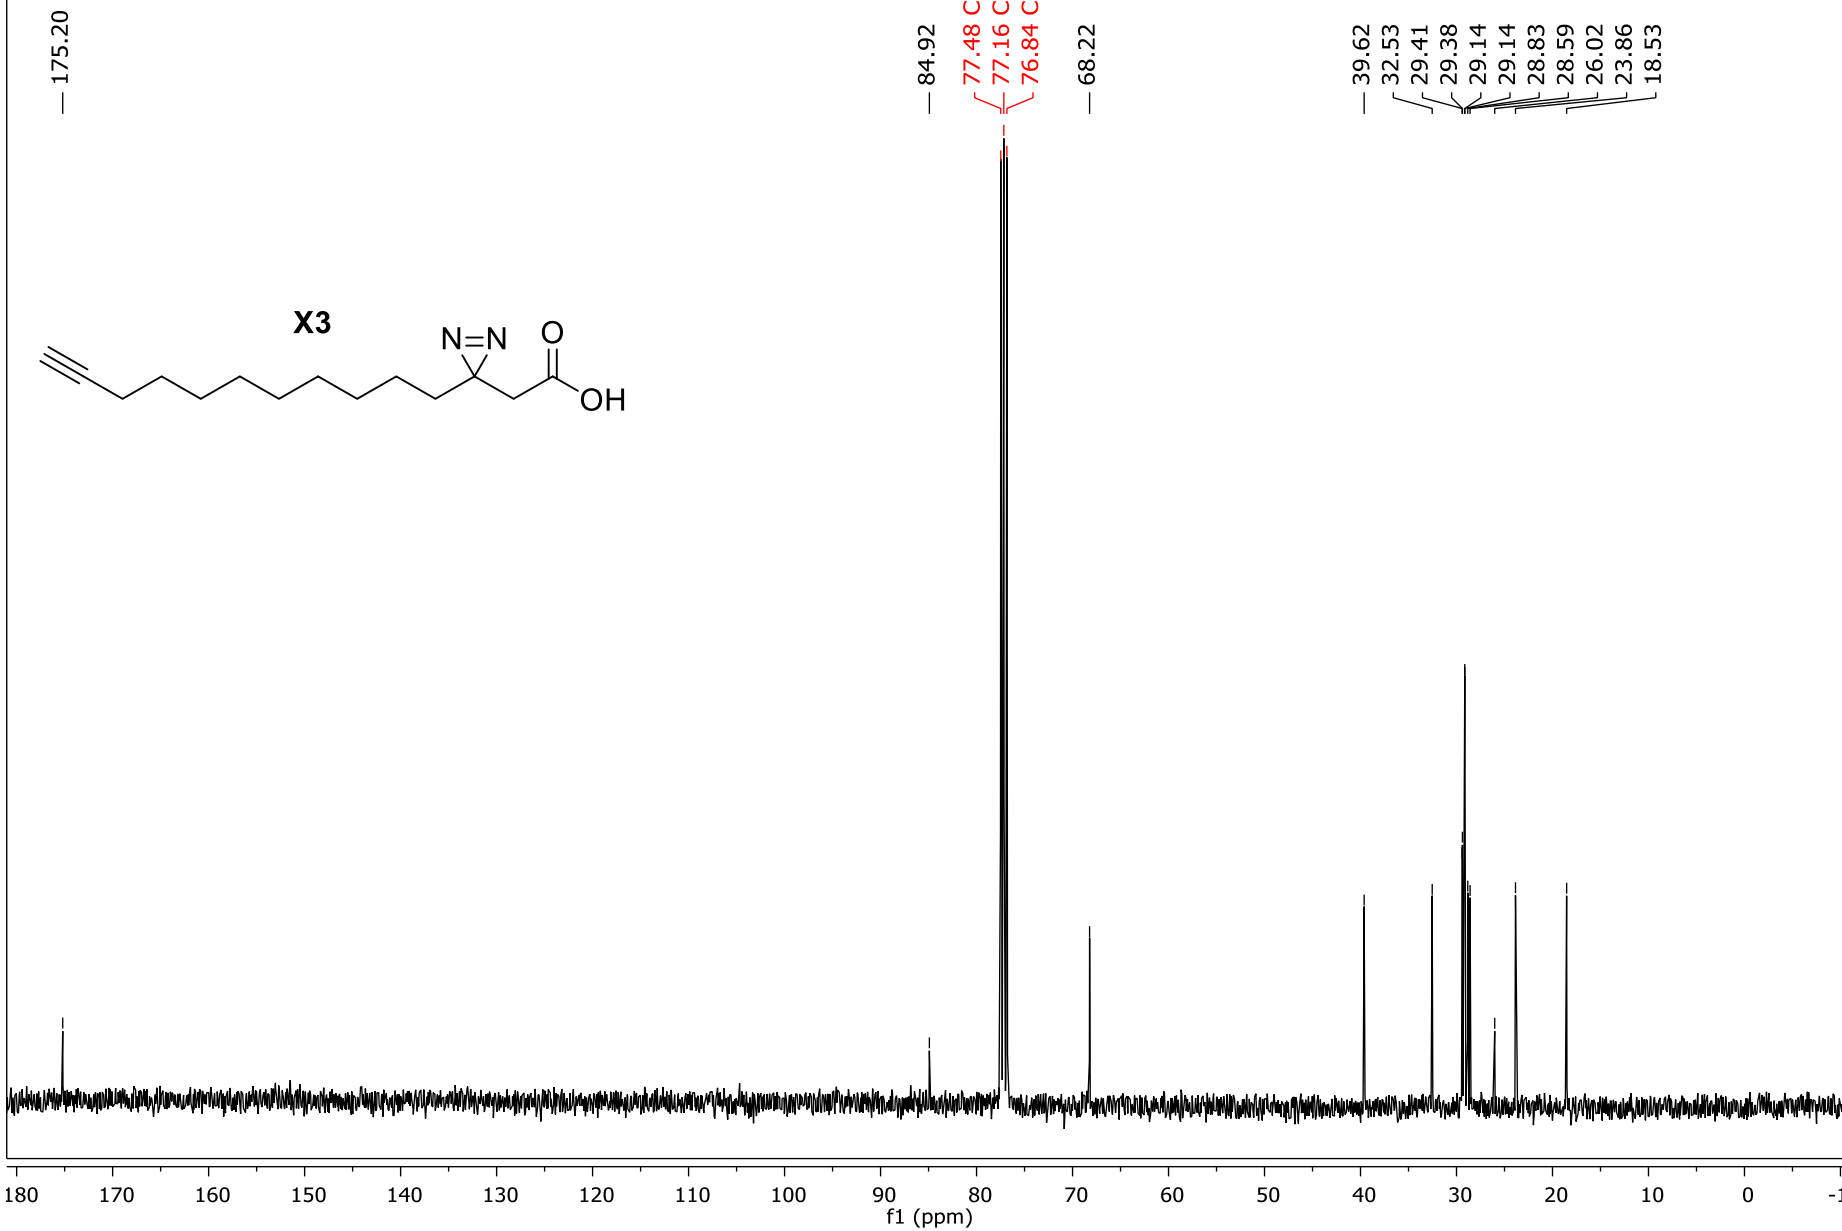

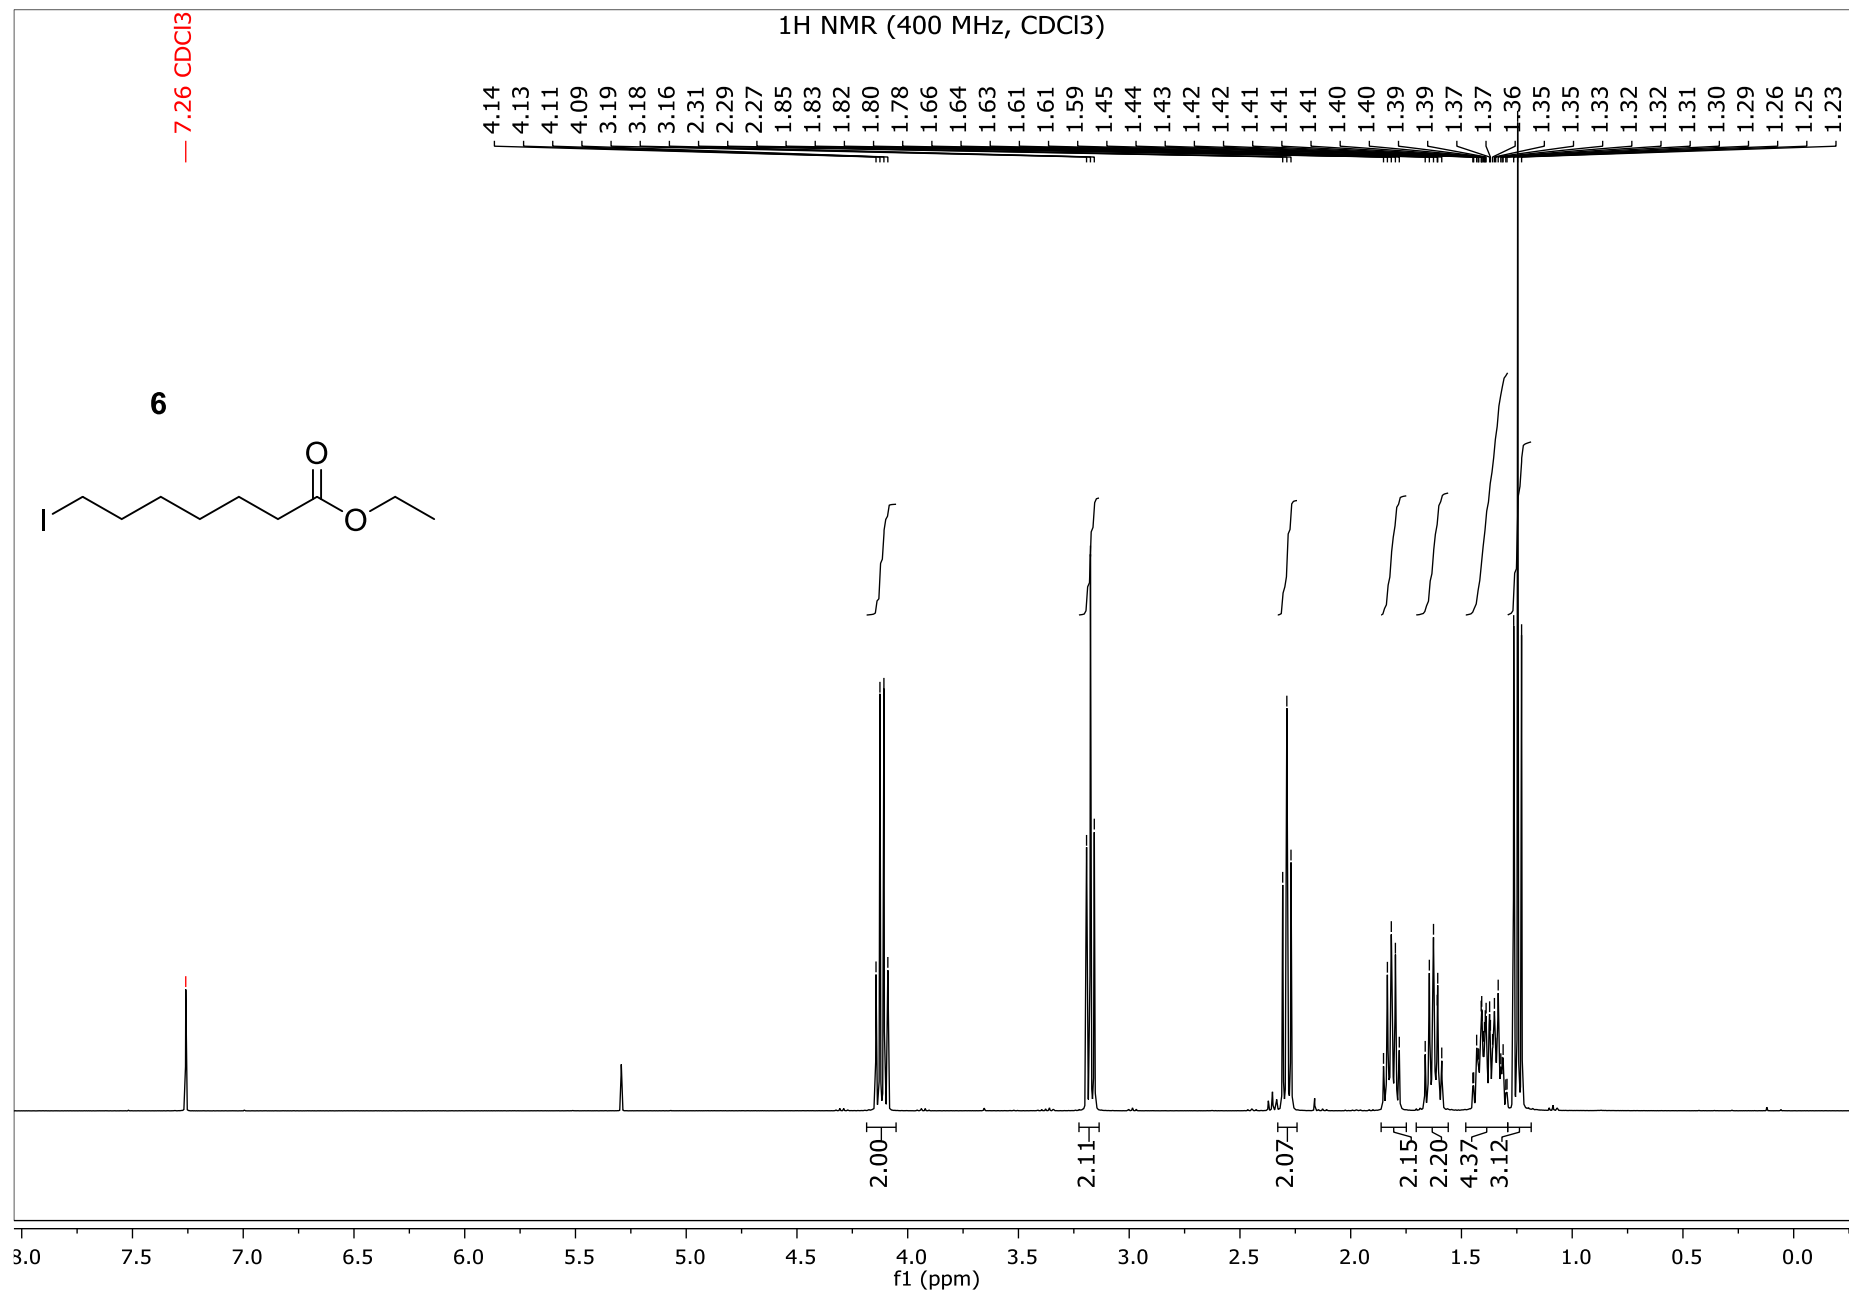



1H NMR (400 MHz, CDCl3)

7.26 CDCl3

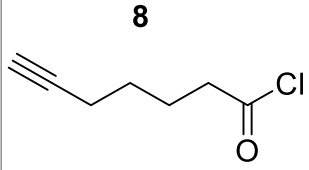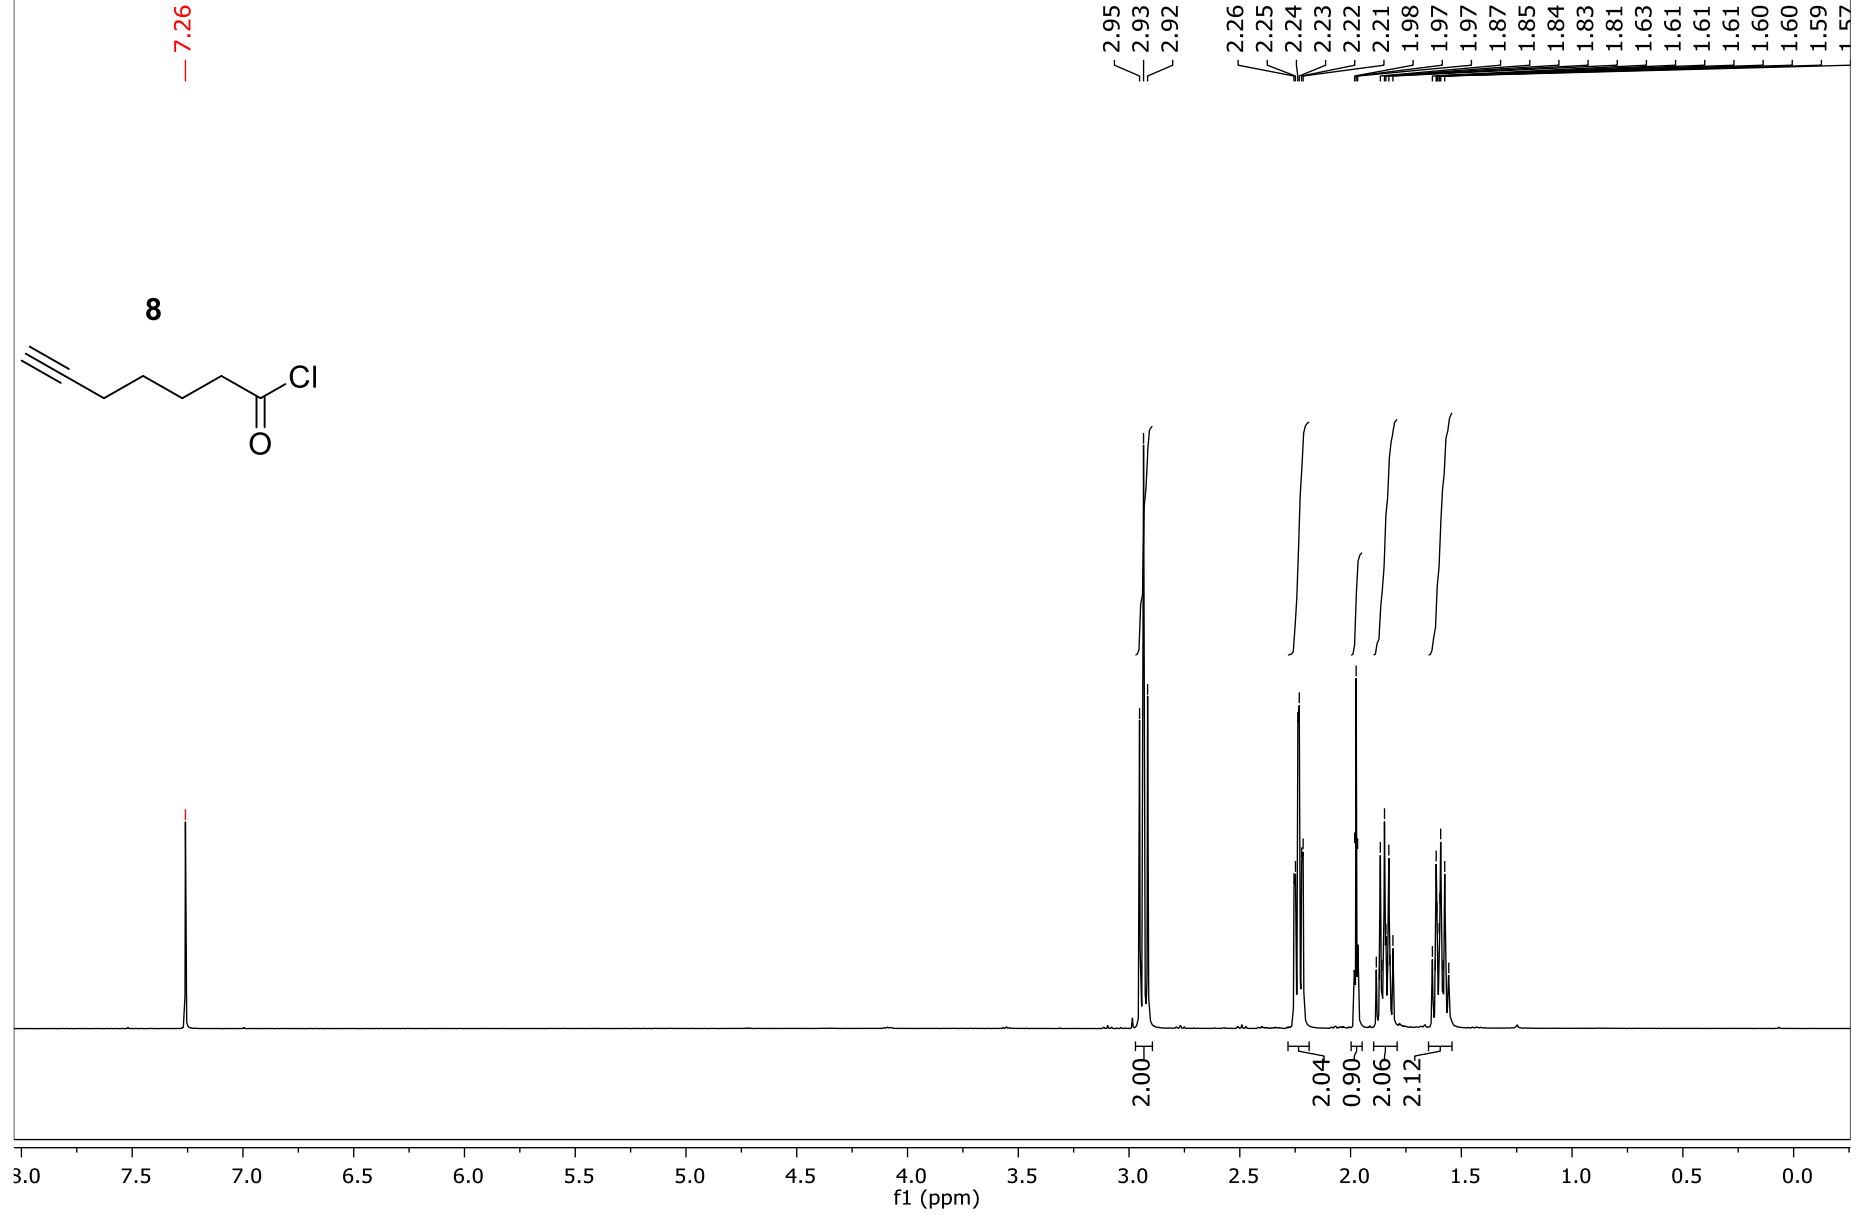

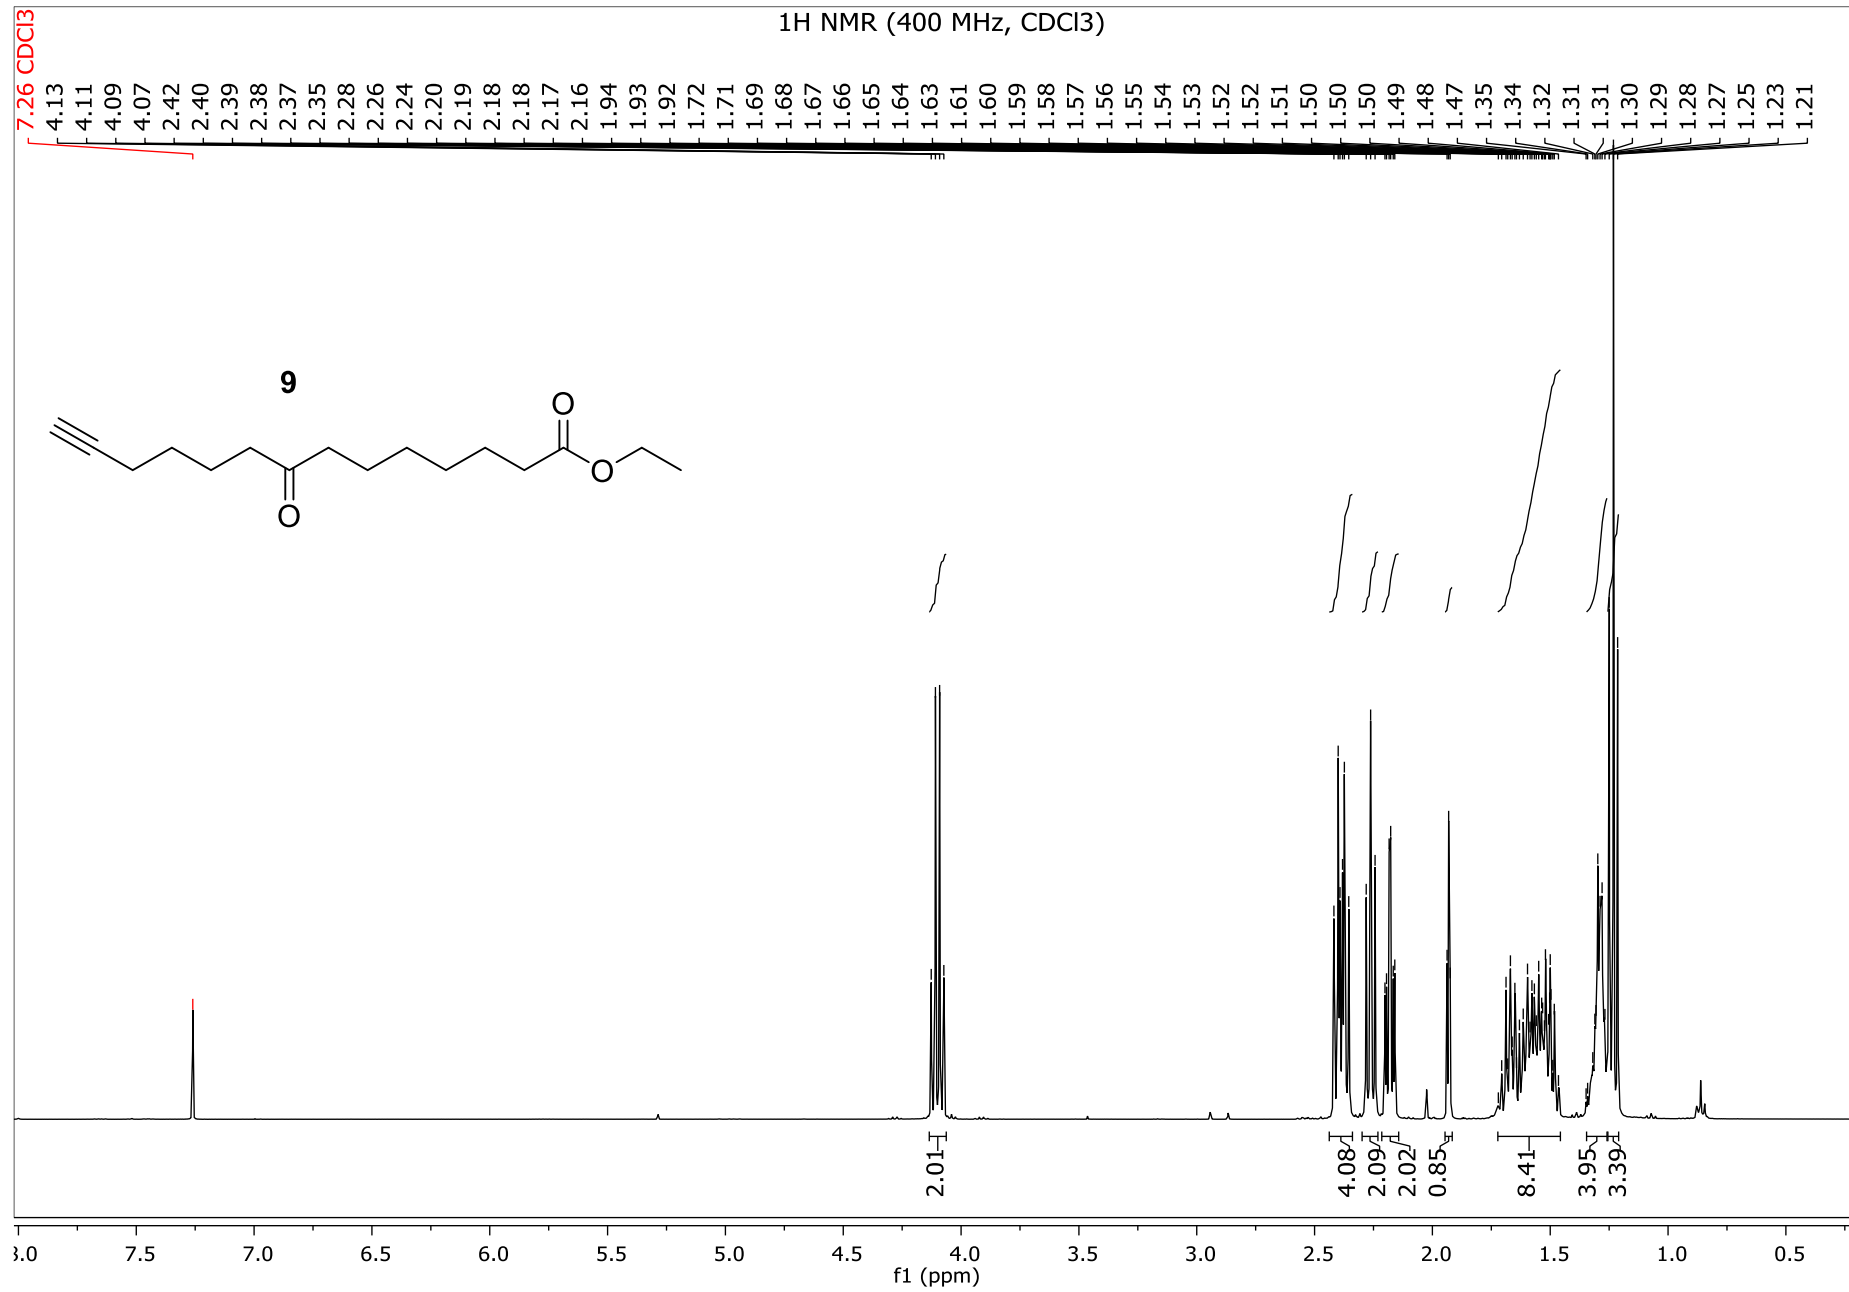

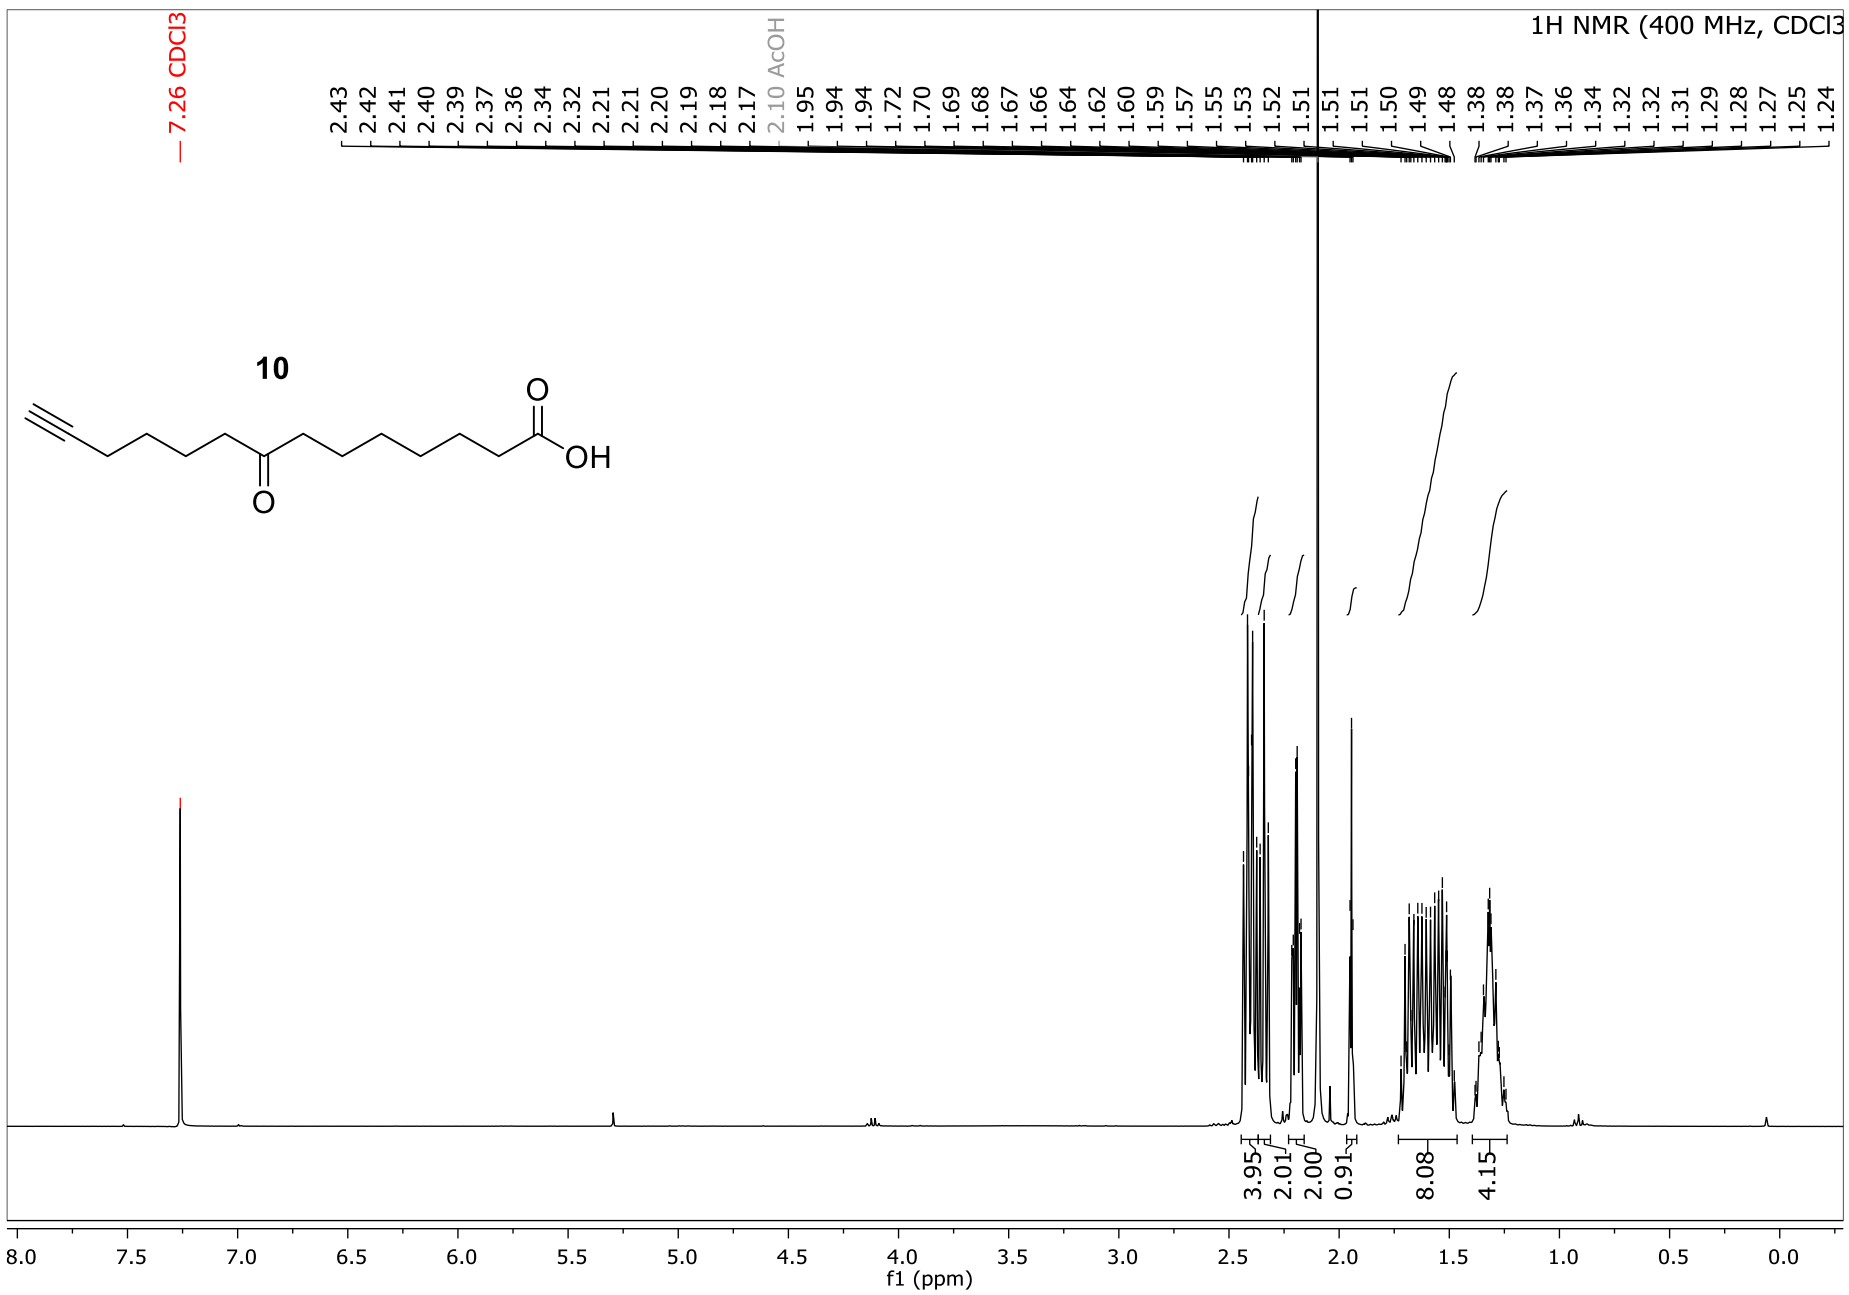

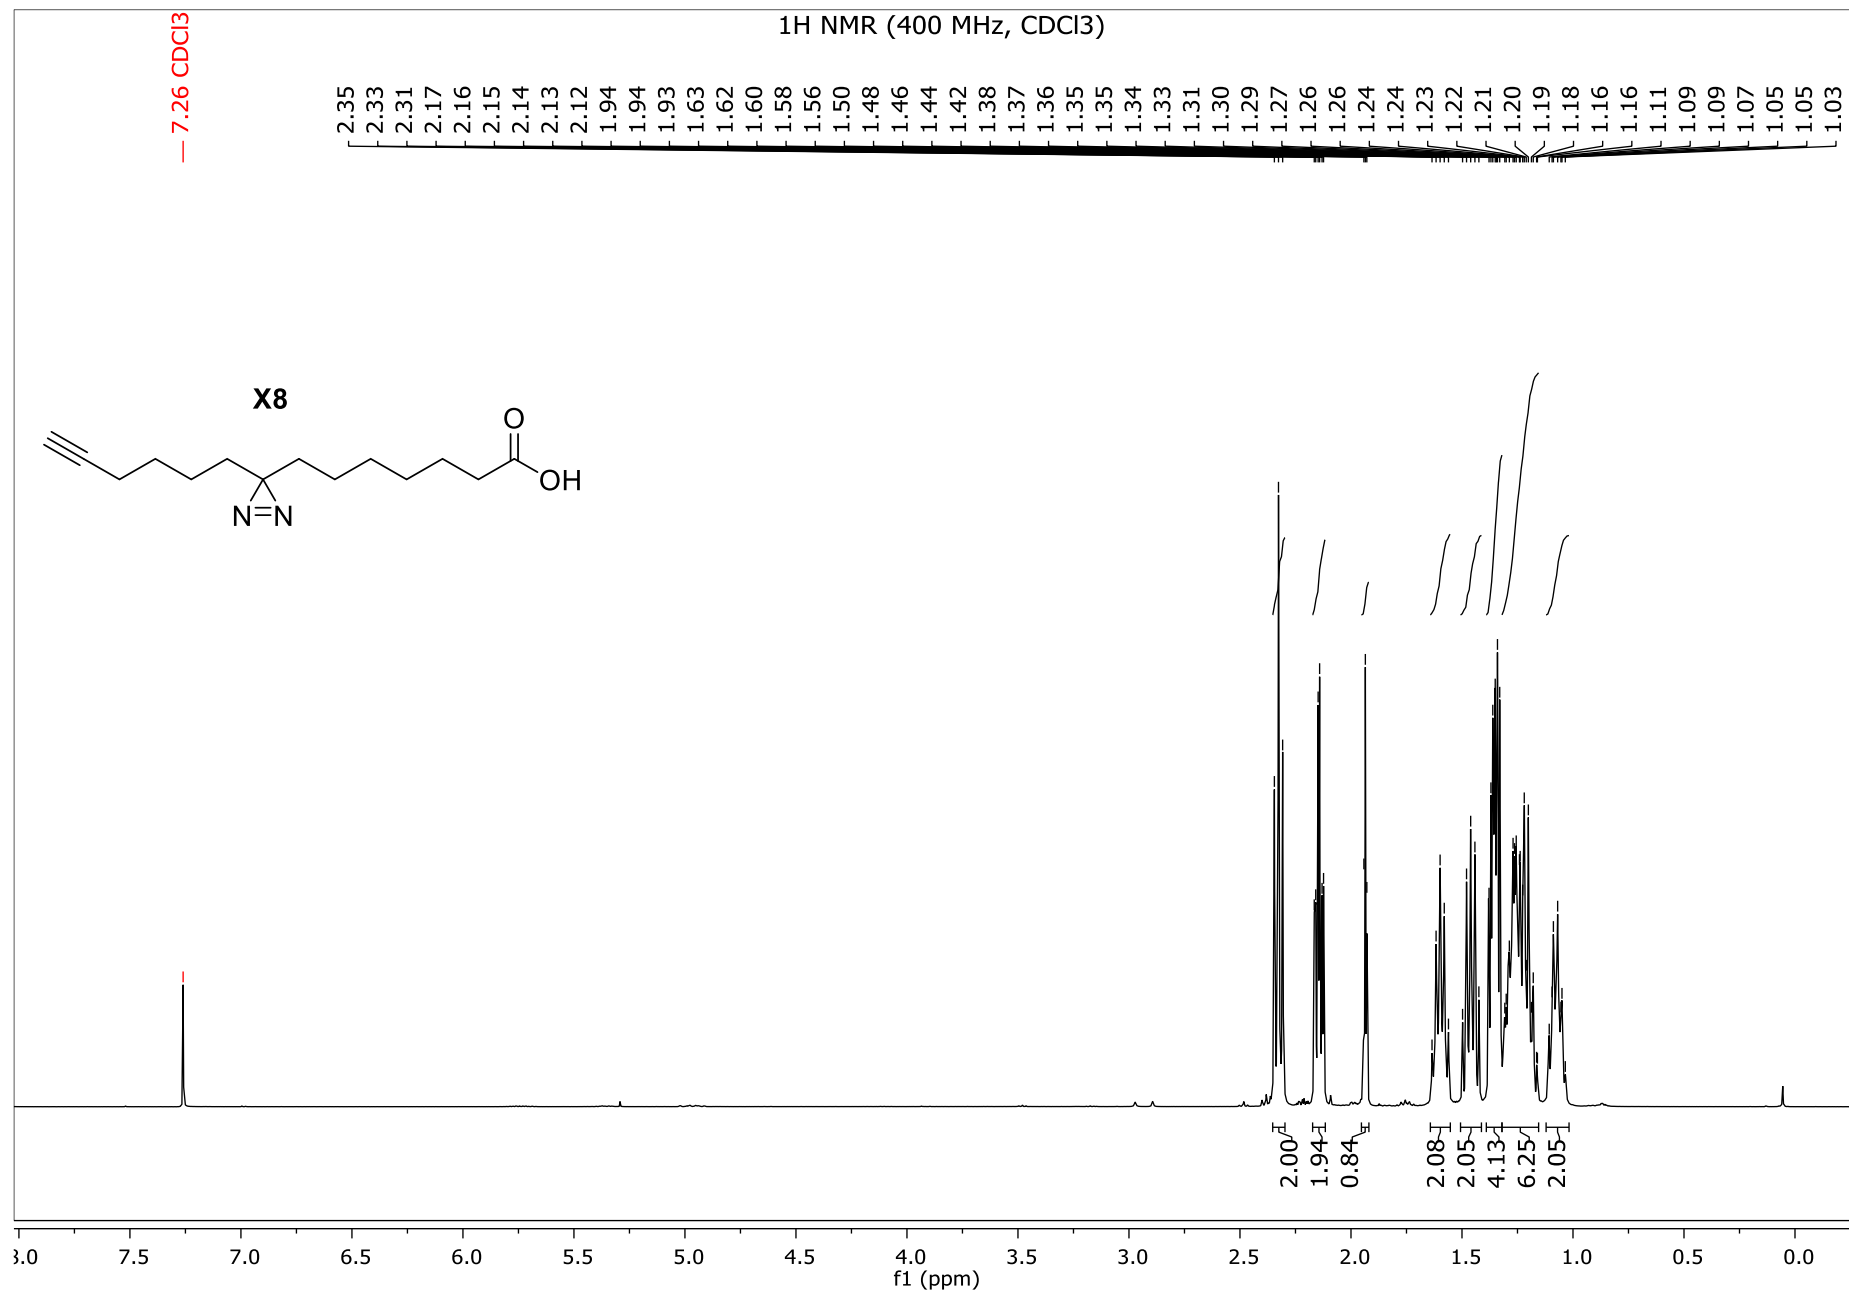

<sup>13</sup>C NMR (101 MHz, CDCl<sub>3</sub>)

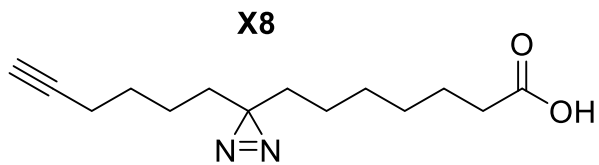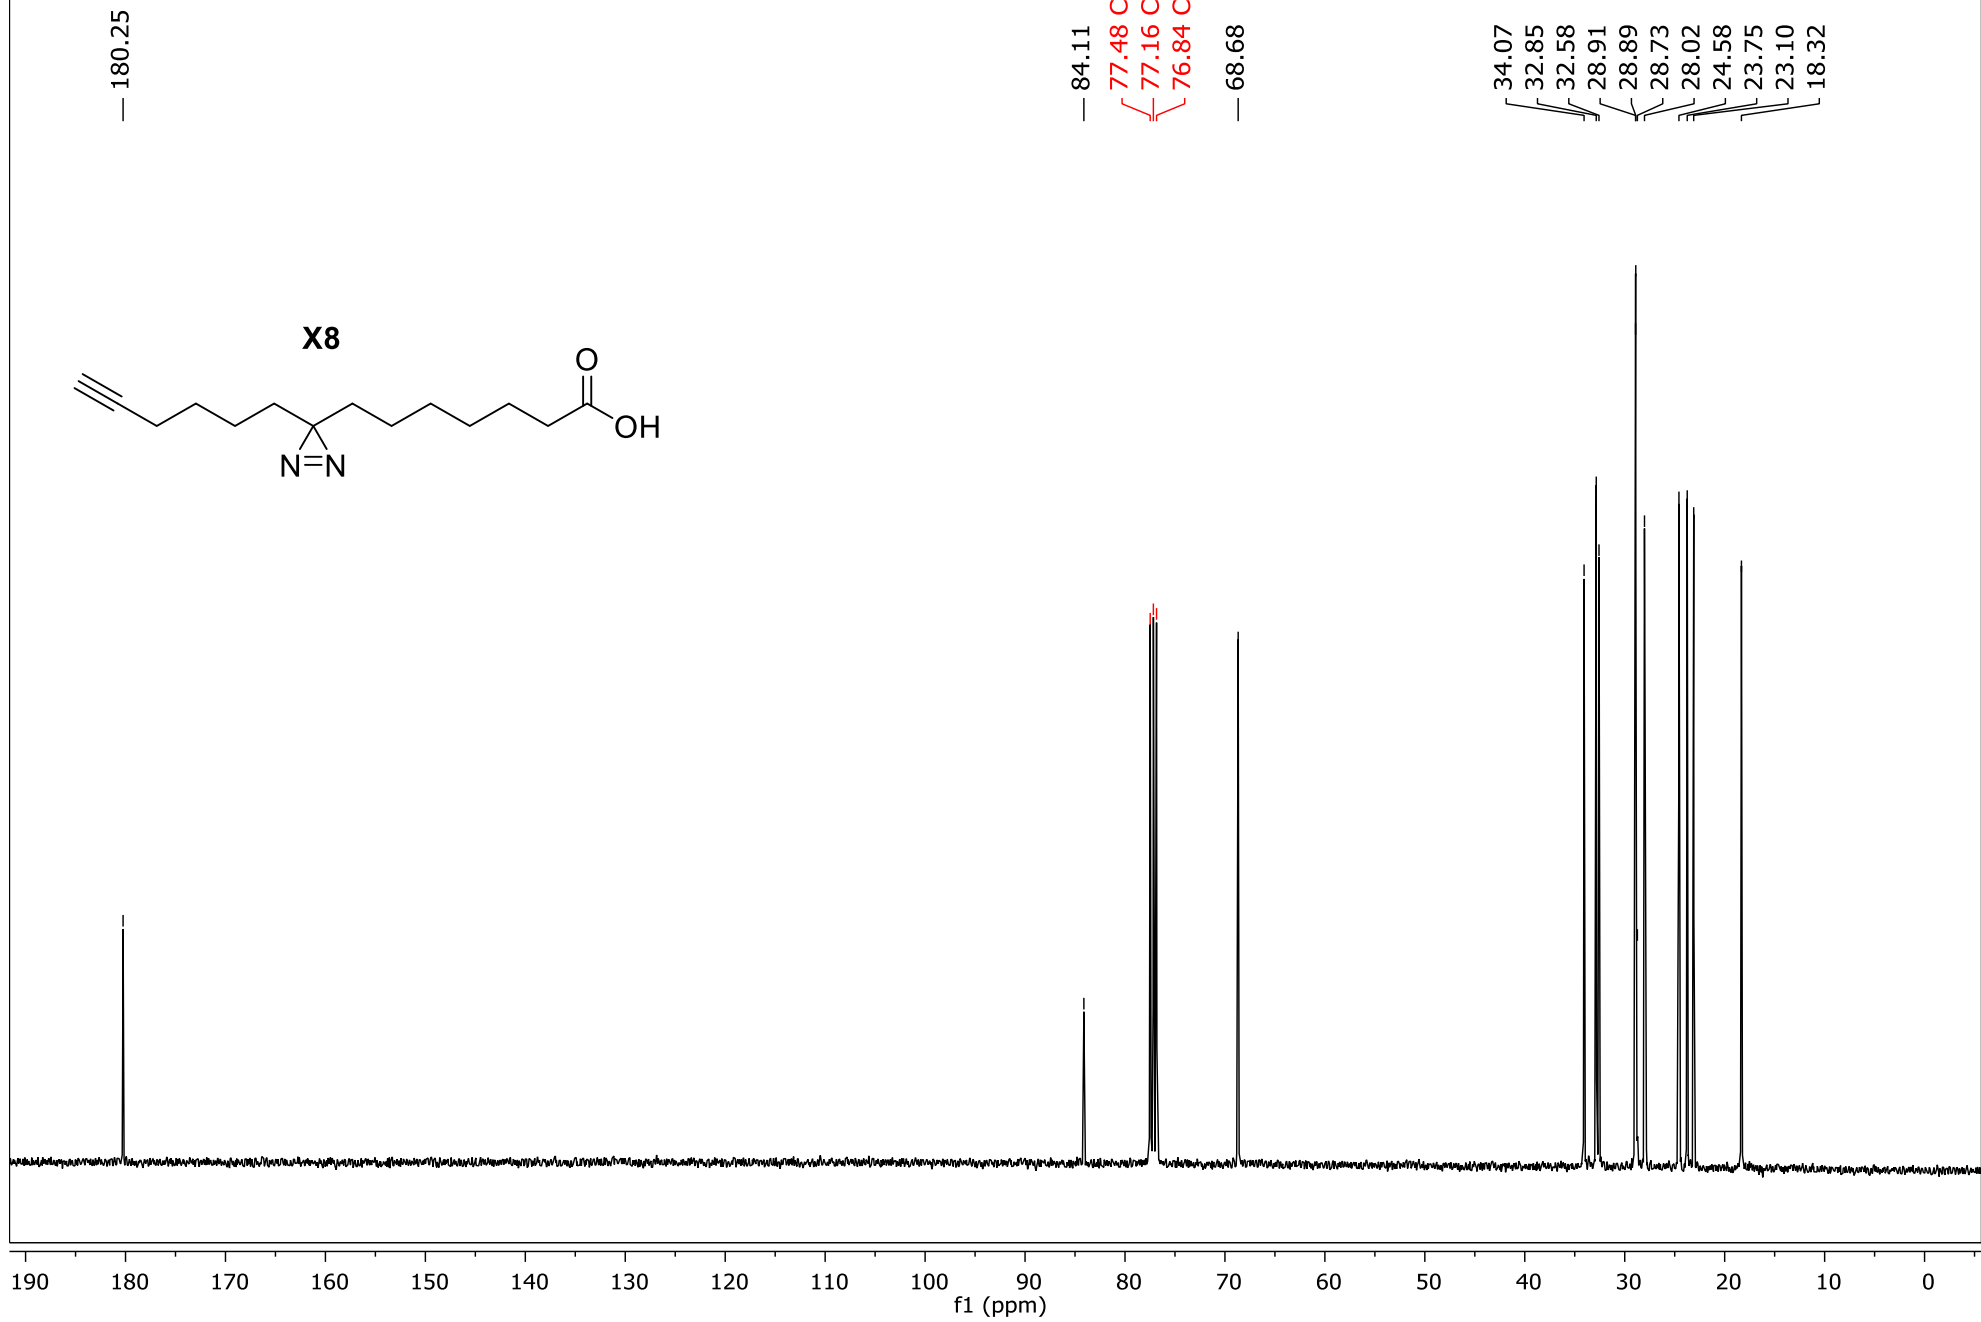

1H NMR (400 MHz, CDCl3)

— 7.26 CDCl3

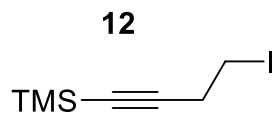

3.23  
3.22  
3.20  
2.81  
2.79  
2.77

0.16

2.00

2.01

8.92

7.5 7.0 6.5 6.0 5.5 5.0 4.5 4.0 3.5 3.0 2.5 2.0 1.5 1.0 0.5 0.0

f1 (ppm)

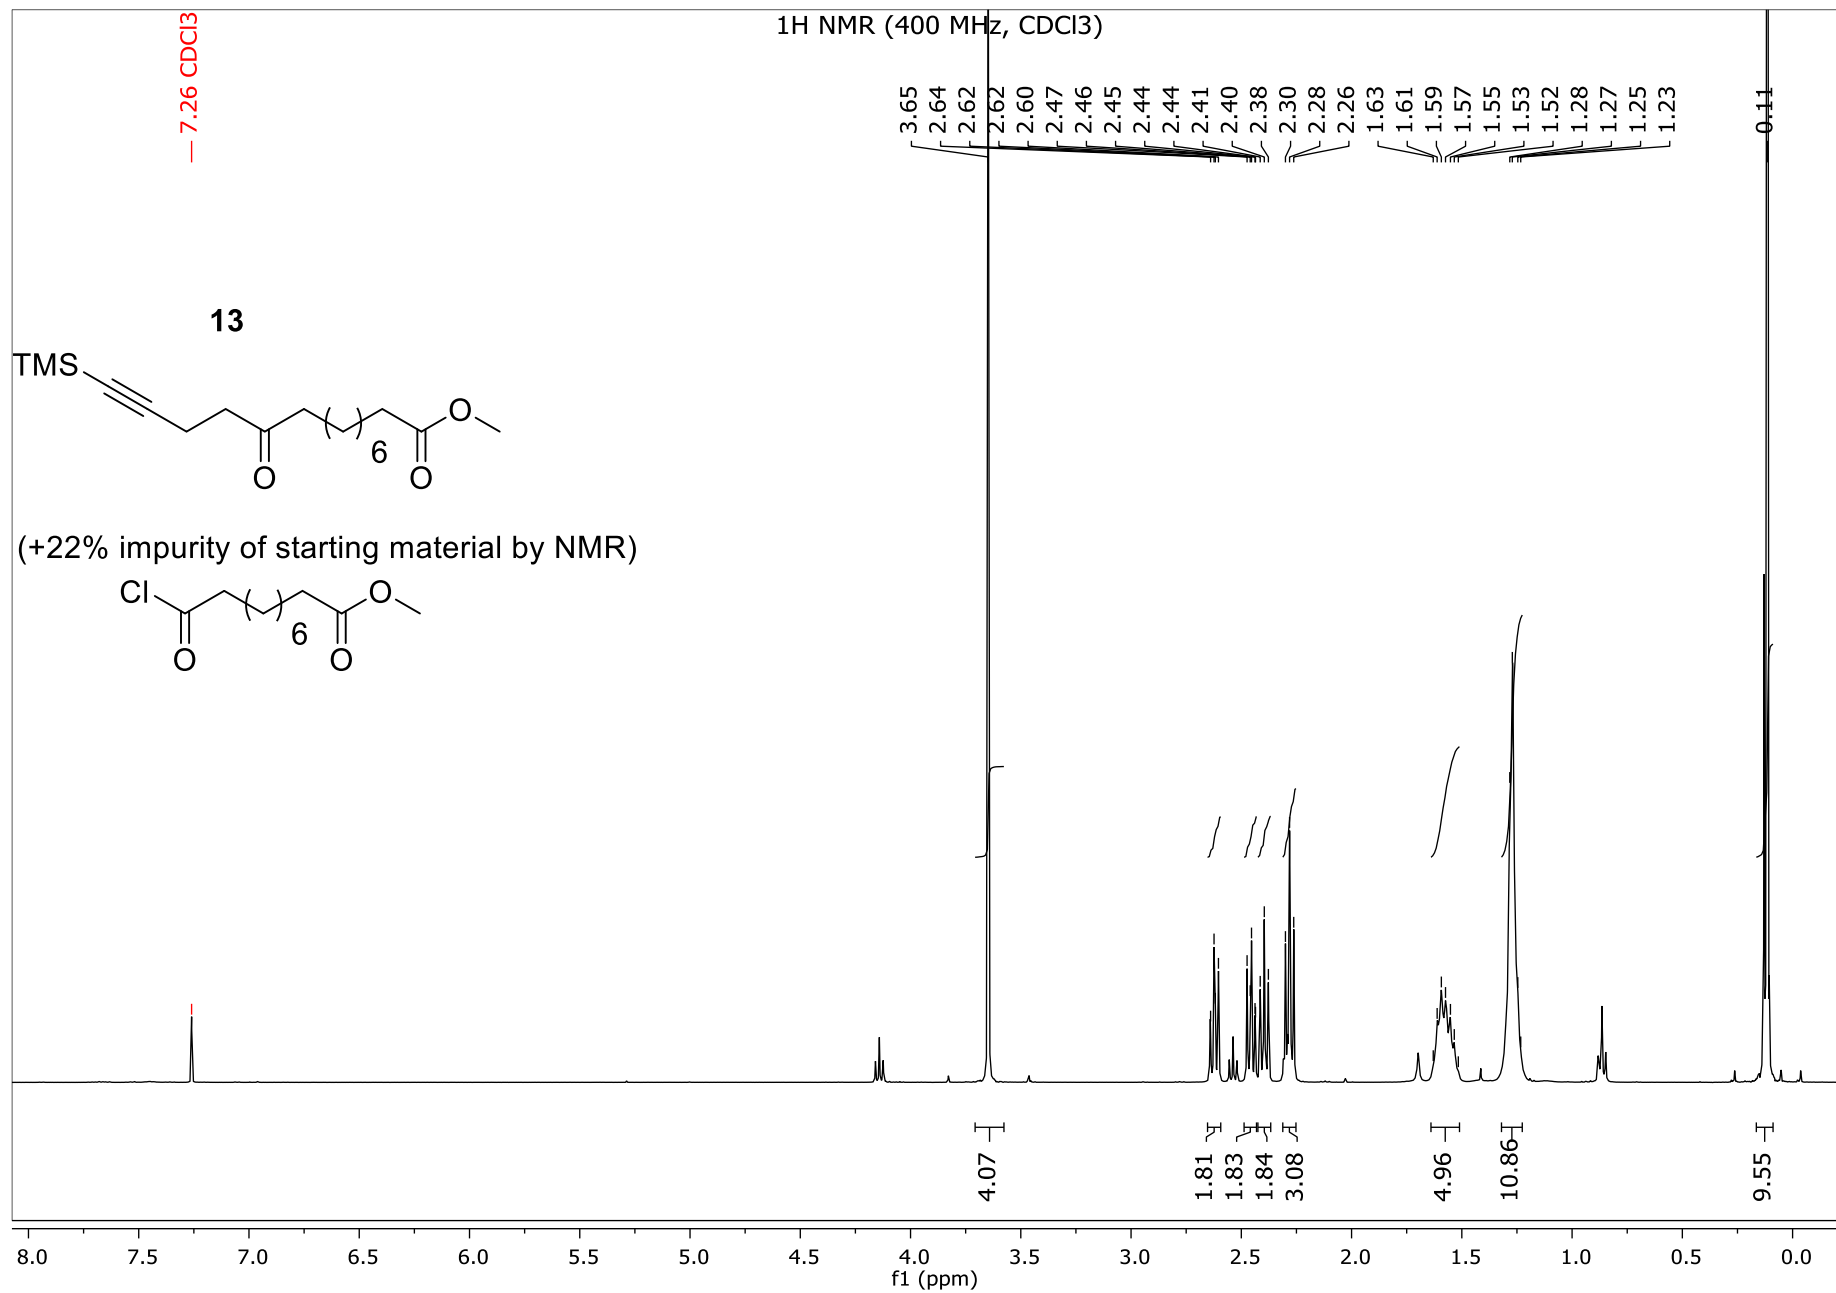

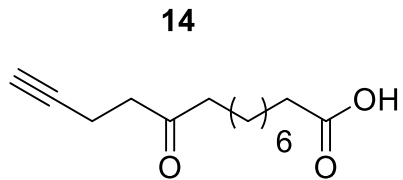

— 7.26 CDCl<sub>3</sub>

<sup>1</sup>H NMR (400 MHz, CDCl<sub>3</sub>)

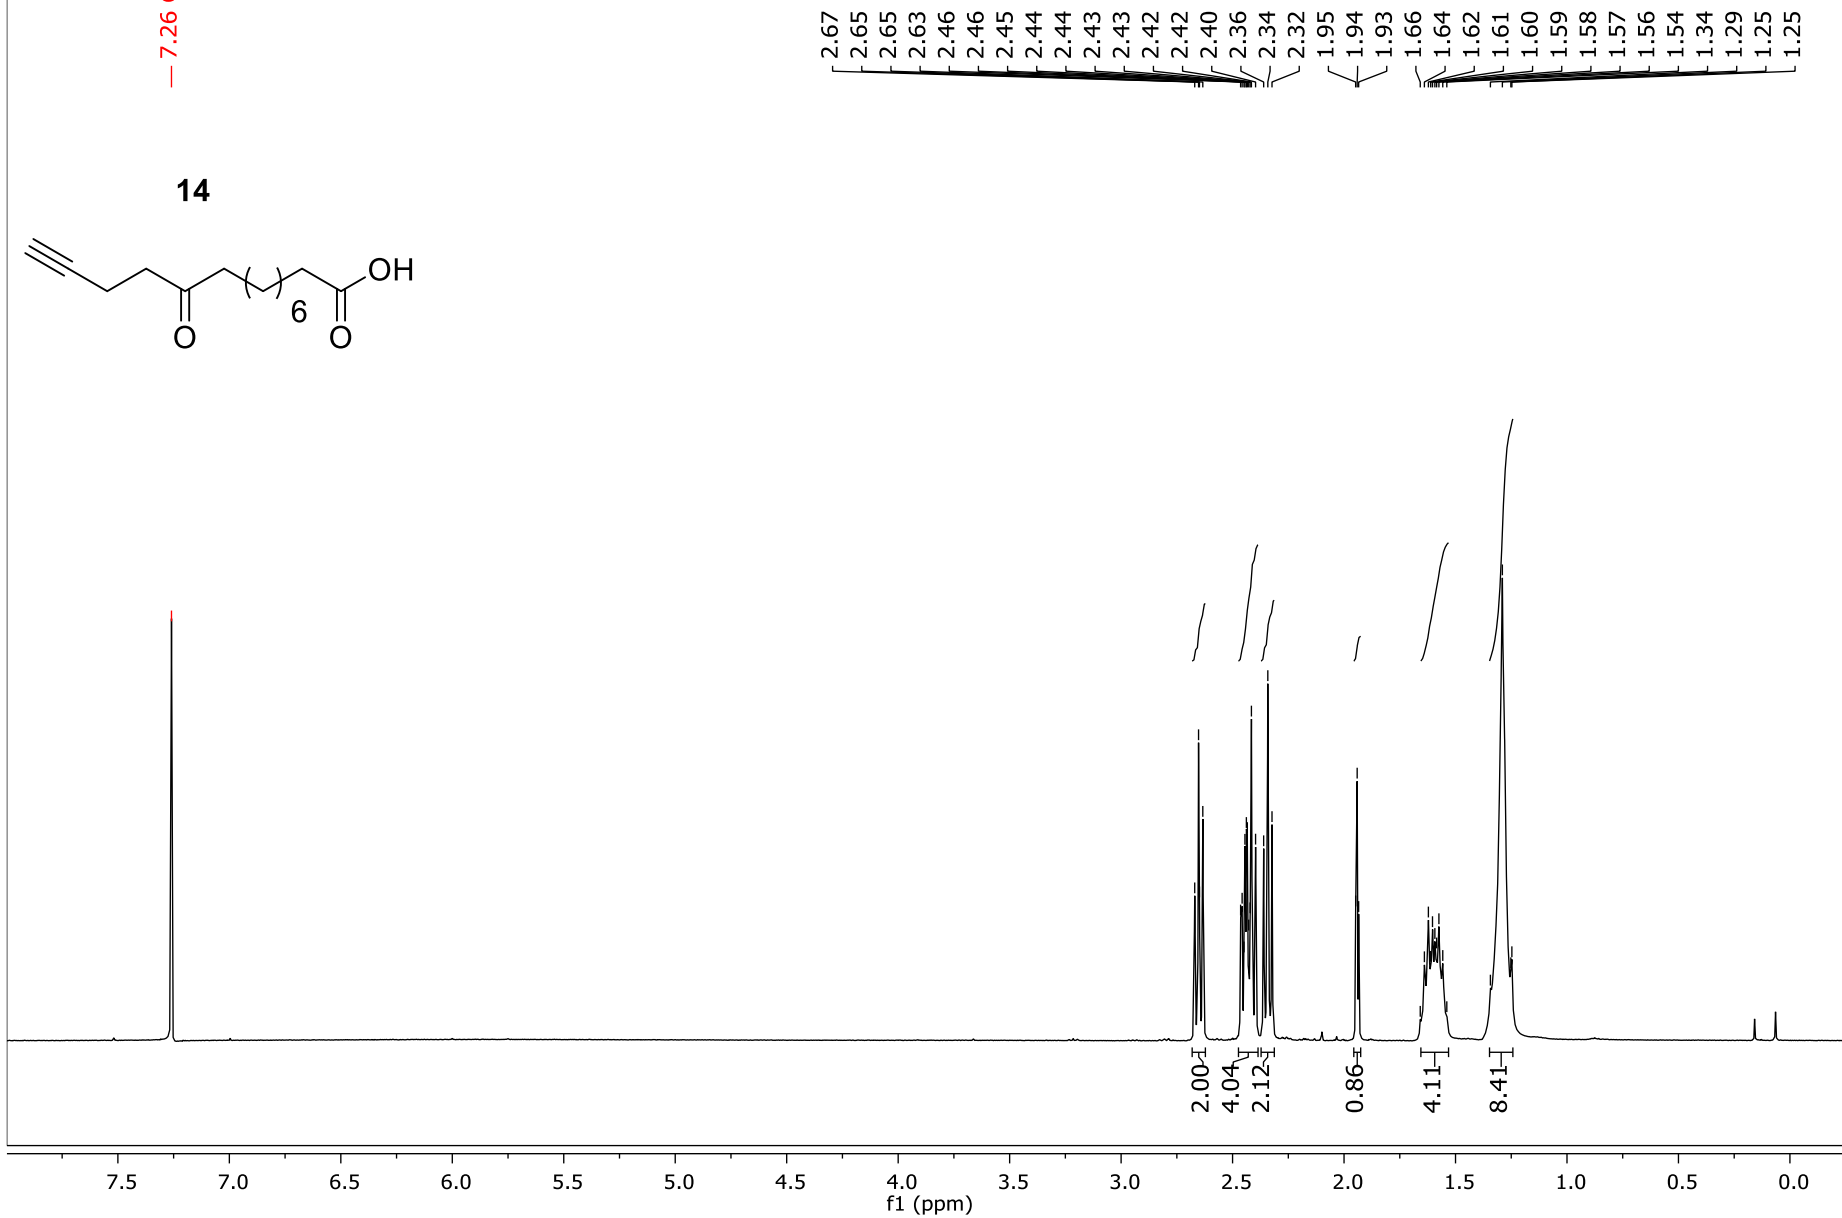



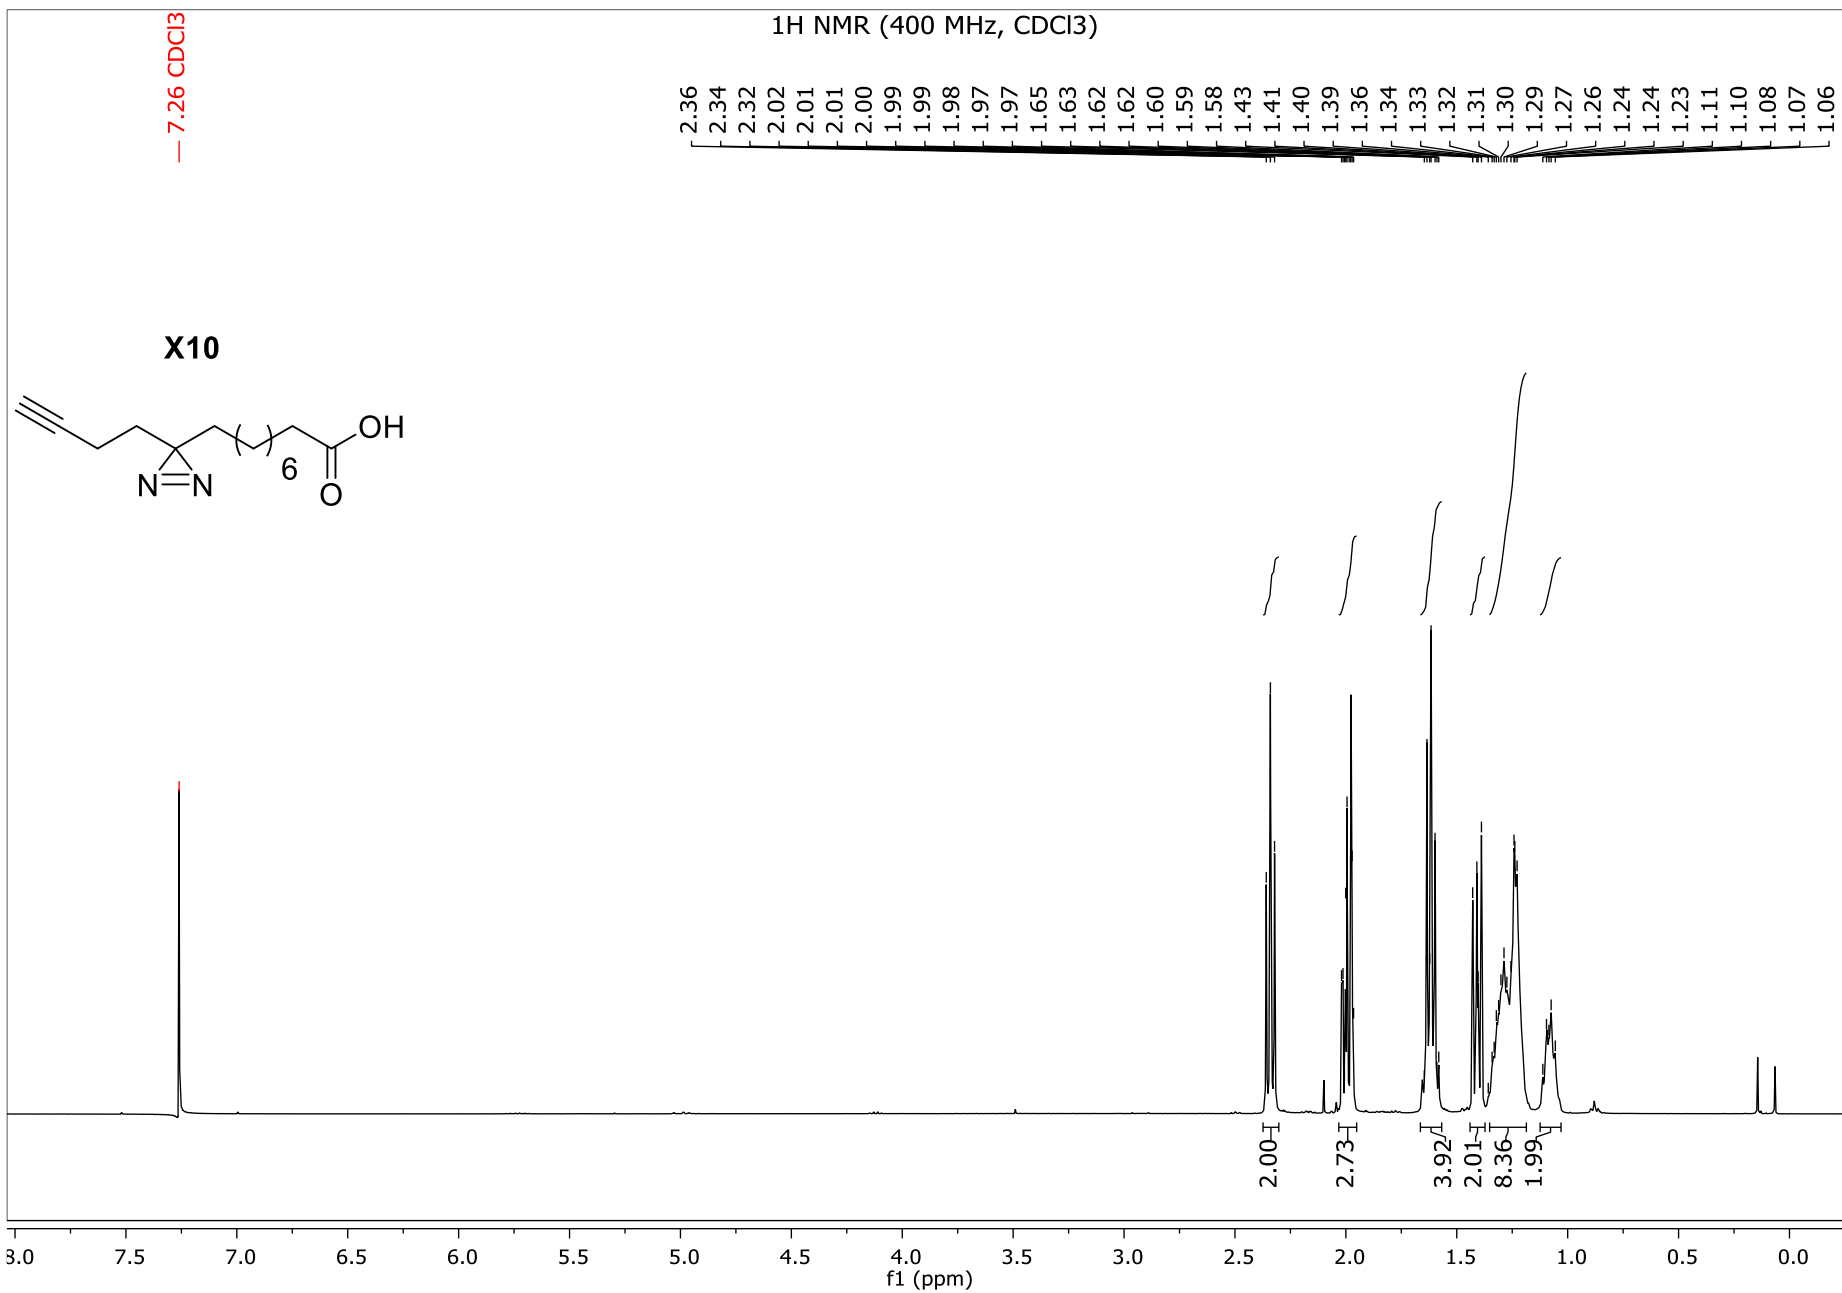

<sup>13</sup>C NMR (101 MHz, CDCl<sub>3</sub>)

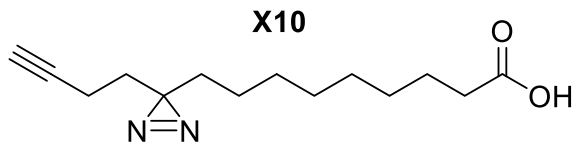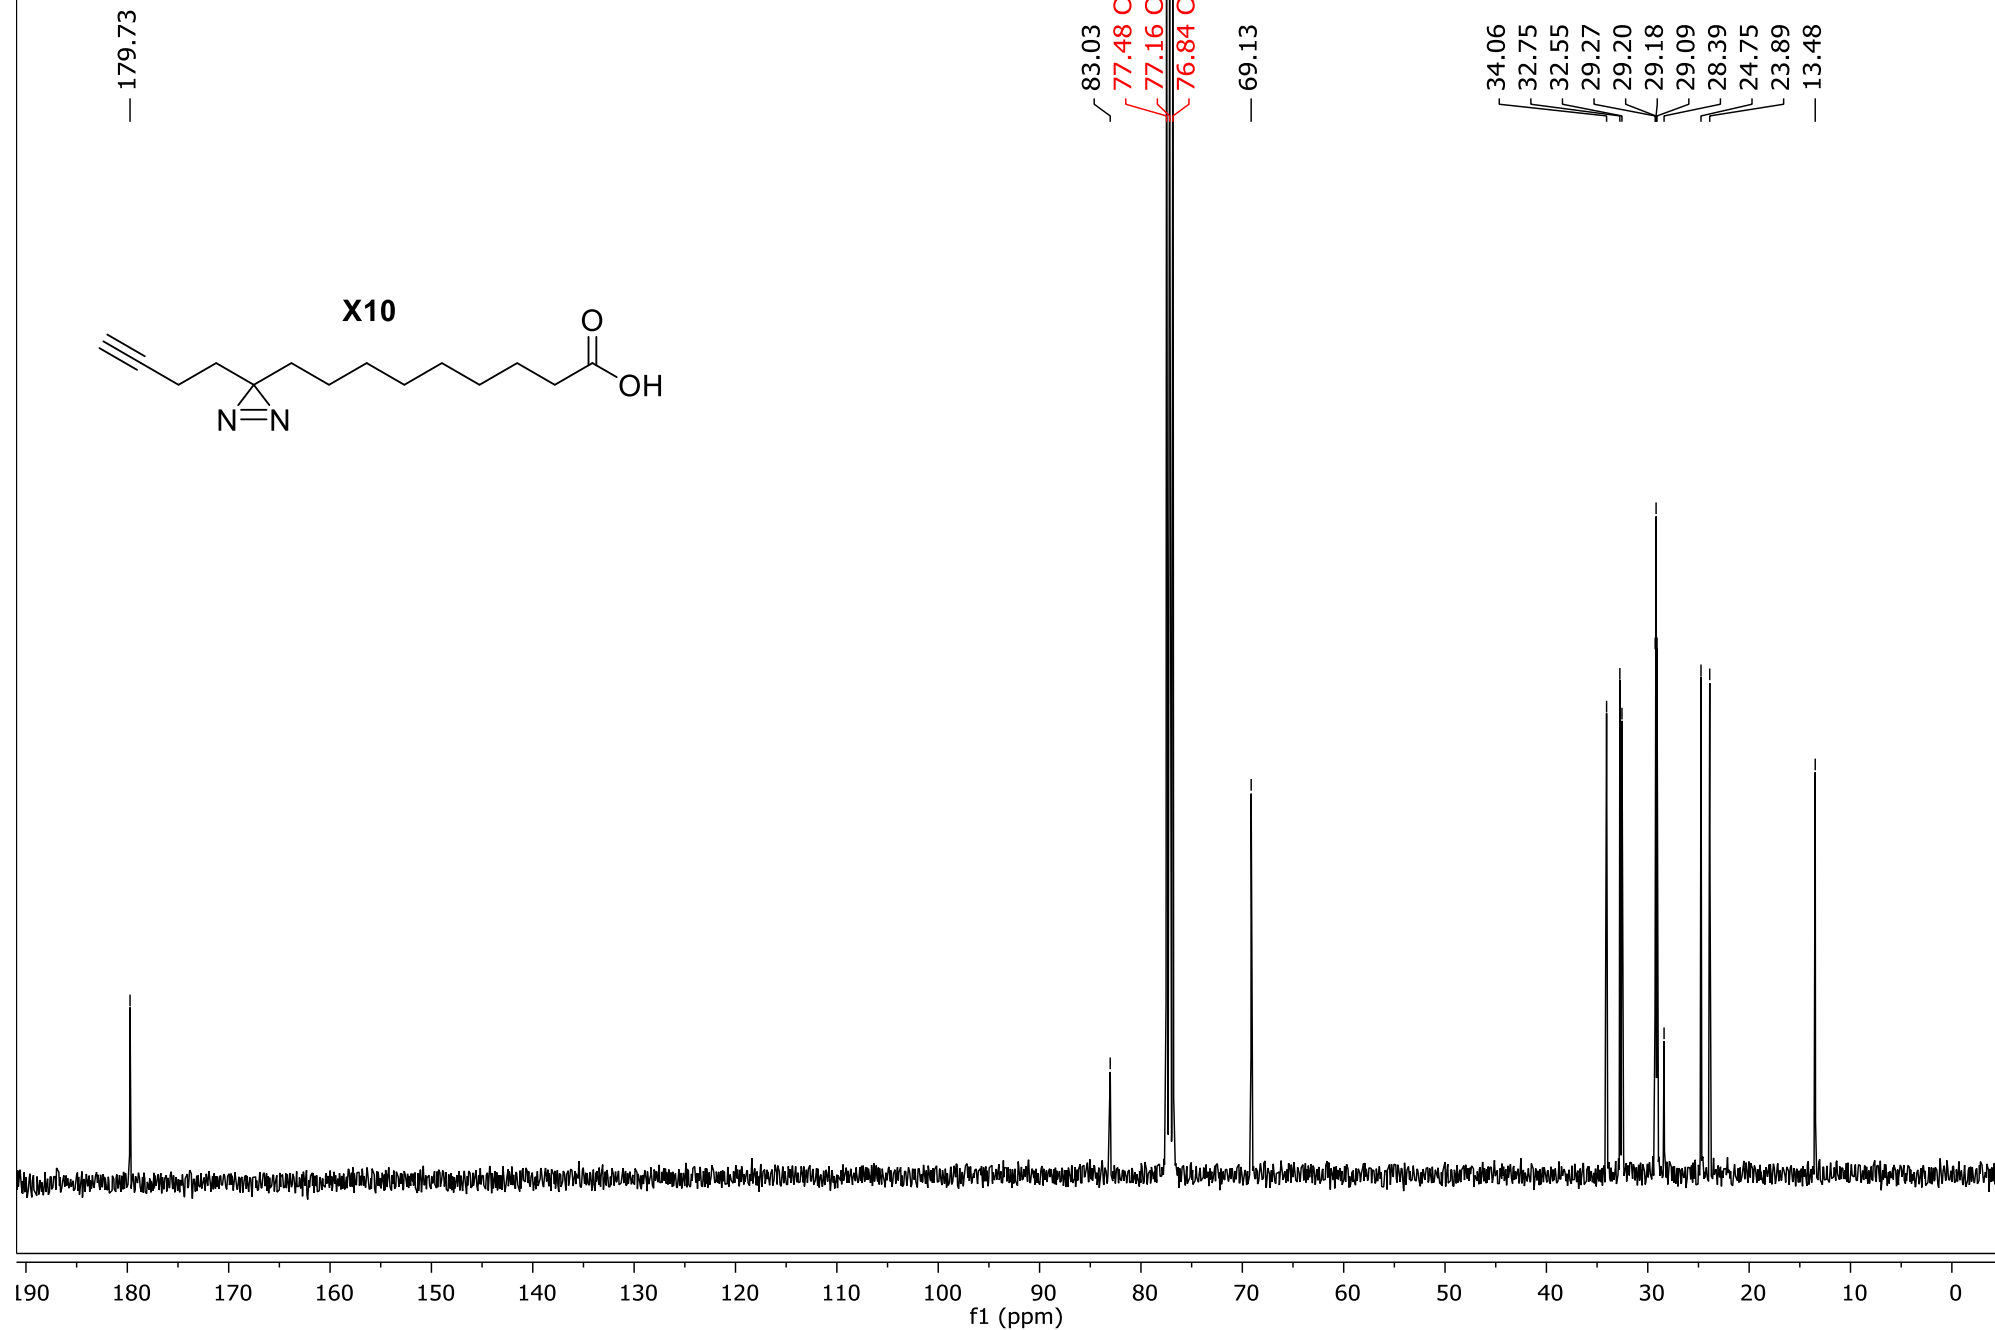

Supplement: d2sc06116c2.pdf [file d2sc06116c2.pdf]
